# Supplementary material for: Normalization of puberty and adult height in girls with Turner syndrome: results of the Swedish Growth Hormone trials initiating transition into adulthood
Source: PubMed Central journal article supplement (PMC10389045; doi:10.3389/fendo.2023.1197897), 2023-07-17
Supplement: DataSheet_1.pdf [file DataSheet_1.pdf]

## Supplementary material to

# Normalization of puberty and adult height in girls with Turner syndrome: results of the Swedish Growth Hormone trials initiating transition into adulthood

Berit Kriström 1‡, Carina Ankarberg-Lindgren 2‡, Marie-Louise Barrenäs 3, Karlolof Nilsson 4, and Kerstin Albertsson-Wikland 3\*

<sup>1</sup>Department of Clinical Science, Pediatrics, Umeå University, Umeå, Sweden

<sup>2</sup>Institute of Clinical Sciences, Department of Pediatrics, Göteborg Pediatric Growth Research Center, Sahlgrenska Academy, University of Gothenburg, Gothenburg, Sweden

<sup>3</sup>Institute of Neuroscience and Physiology, Department of Physiology/Endocrinology, Sahlgrenska Academy, University of Gothenburg, Gothenburg, Sweden

<sup>4</sup>Department of Clinical Sciences, University Hospital Malmö, Lund University, Malmö, Sweden

‡**Equal contribution and first authorship:** These authors contributed equally to this work and share first authorship.

\***Correspondence:**

Kerstin Albertsson-Wikland, [kerstin.albertsson.wikland@gu.se](mailto:kerstin.albertsson.wikland@gu.se)

**Supplementary Tables..... page**

**References .....2**

**Comparison between GH doses per age group PP: .....3-8**

**Table 1a** Pretreatment characteristics, PP population, **young** vs dose .....3

**Table 1b** Auxology from GHstart to PO, PP population, young vs dose .....4

**Table 1c** Auxology at adult height, PP population, young vs dose .....5

**Table 2a** Pretreatment characteristics, PP population, **old** vs dose .....6

**Table 2b** Auxology from GHstart to PO, PP population, old vs dose .....7

**Table 2c** Auxology at adult height, PP population, old vs dose .....8

**Comparison between GH doses for both age groups ITT: .....9-11**

**Table 3a** Pretreatment characteristics, ITT population, **all girls vs dose** .....9

**Table 3b** Auxology from GHstart to PO, ITT population, all girls vs dose .....10

**Table 3c** Auxology at adult height, ITT population, all girls vs dose .....11

**Comparison between ages per GH dose ITT: .....12-14**

**Table 4a** Pre-treatment characteristics, ITT population, **all girls vs age** .....12

**Table 4b** Auxology from GH-start to PO, ITT population, all girls vs age .....13

**Table 4c** Auxology at adult height, ITT population, all girls vs age .....14

**Table 5** Auxology from birth to adult height, PP population, **Turner Reference** .....15

**Comparison between GH doses for both age groups PP: .....16-18**

**Table 6a** Pretreatment characteristics, PP population, **all girls vs dose** .....16

**Table 6b** Auxology from GH-start, PP population, all girls vs dose .....17

**Table 6c** Auxology at adult height, PP population, all girls vs dose .....18

**Comparison between ages per GH dose PP: .....19-21**

**Table 7a** Pretreatment characteristics, PP population, **all girls vs age** .....19

**Table 7b** Auxology from GH-start, PP population, all girls vs age .....20

**Table 7c** Auxology at adult height, PP population, all girls vs age .....21

**References:**

1. **Niklasson A & Albertsson-Wikland, K:** Continuous growth reference from 24<sup>th</sup> week of gestation to 24 months by gender. *BMC Pediatrics* 2008;8:8
2. **Albertsson-Wikland, K, Luo ZC, Niklasson A, Karlberg J:** Swedish population-based longitudinal reference values from birth to 18 years of age for height, weight, and head circumference. *Acta Paediatrica* 2002;91: 739-754.
3. **Luo ZC, Albertsson-Wikland K, Karlberg J:** Target height as predicted by parental heights in a population-based study. *Pediatric Research* 1998;44:563-571.
4. **Karlberg J:** on the construction of the infancy-childhood-puberty growth standard. *Acta Paediatrica Scandinavia*1989;356:26-37.
5. **Karlberg J, Albertsson-Wikland K, Weiss Naeraa R:** The Infancy-Childhood-Puberty (ICP) Model of Growth for Turner Girls. *Excerpta Medica ICS* 1991;924:89-94.
6. **Rongen-Westlaken C, Corel L, van den Broeck J, Massa G, Karlberg J, Albertsson-Wikland K, Naeraa RW, Wit JM:** Reference values for height, height velocity, and weight in Turner ‘s syndrome. *Acta Paediatrica* 1997;86:937-942.

Suppl Table 1a. Pre-treatment characteristics for the **young** subgroup versus dose in the PP population versus Swedish references {1,2,3,4}.

| Variables                                                            | Dose 33 µg<br>(n=25)                             | Dose 67 µg<br>(n=28)                             | p-value | Difference between<br>groups<br>Mean (95% CI) | Effect<br>Size |
|----------------------------------------------------------------------|--------------------------------------------------|--------------------------------------------------|---------|-----------------------------------------------|----------------|
| <b>Karyotype 45X</b>                                                 | 20 (80.0%)                                       | 15 (53.6%)                                       |         |                                               |                |
| <b>Mosaic</b>                                                        | 1 (4.0%)                                         | 1 (3.6%)                                         |         |                                               |                |
| <b>Other</b>                                                         | 4 (16.0%)                                        | 12 (42.9%)                                       | 0.085   |                                               |                |
| <b>Missing</b>                                                       |                                                  |                                                  |         |                                               |                |
| <b>At birth</b>                                                      |                                                  |                                                  |         |                                               |                |
| <b>GA<br/>(weeks)</b>                                                | 38.7 (1.6)<br>39 (36; 42)<br>n=24                | 38.7 (2.0)<br>39 (35; 42)<br>n=27                | 1.00    | -0.037<br>(-1.077; 1.000)                     | 0.021          |
| <b>Length<br/>(SDS)</b>                                              | -2.48 (1.53)<br>-2.46 (-5; 0.9)<br>n=25          | -2.07 (1.16)<br>-2 (-4.34; 0.23)<br>n=28         | 0.27    | -0.416<br>(-1.151; 0.330)                     | 0.309          |
| <b>Weight<br/>(SDS)</b>                                              | -1.50 (1.47)<br>-1.27 (-5.11; 0.37)<br>n=25      | -1.28 (1.20)<br>-0.87 (-3.92; 0.18)<br>n=28      | 0.56    | -0.216<br>(-0.946; 0.532)                     | 0.162          |
| <b>Mother height<br/>(SDS)</b>                                       | -0.239 (0.876)<br>-0.341 (-1.504; 0.997)<br>n=25 | -0.017 (1.265)<br>-0.142 (-2.078; 2.333)<br>n=28 | 0.47    | -0.222<br>(-0.835; 0.376)                     | 0.202          |
| <b>Father height<br/>(SDS)</b>                                       | -0.228 (0.875)<br>-0.255 (-1.79; 1.434)<br>n=25  | -0.303 (1.233)<br>-0.332 (-3.326; 1.398)<br>n=28 | 0.80    | 0.075<br>(-0.502; 0.682)                      | 0.070          |
| <b>MPH<br/>(SDS)</b>                                                 | -0.290 (0.828)<br>-0.458 (-2.046; 1.185)<br>n=25 | -0.199 (1.253)<br>-0.363 (-3.356; 2.066)<br>n=28 | 0.76    | -0.091<br>(-0.683; 0.499)                     | 0.085          |
| <b>DiffMPH<br/>(SDS)</b>                                             | -2.19 (1.76)<br>-2.17 (-5.79; 1.48)<br>n=25      | -1.87 (1.29)<br>-1.91 (-4; 0.9)<br>n=28          | 0.44    | -0.325<br>(-1.163; 0.527)                     | 0.212          |
| <b>At GH-start</b>                                                   |                                                  |                                                  |         |                                               |                |
| <b>Pre treatment height velocity,<br/>the years before (cm/year)</b> | 5.46 (1.24)<br>5.49 (3.41; 8.12)<br>n=25         | 5.36 (1.30)<br>5.47 (2.51; 7.41)<br>n=27         | 0.79    | 0.091<br>(-0.620; 0.810)                      | 0.072          |

For categorical variables n (%) is presented.

For continuous variables Mean (SD) / Median (Min; Max) / n= is presented.

For comparison between groups Chi Square Exact test was used for non-ordered categorical variables and the Fisher's Non Parametric Permutation Test was used for continuous variables.

The confidence interval for the mean difference between groups is based on Fishers non-parametric permutation test.

Effect size is absolute difference in mean / pooled SD.

GA, gestational age; GH, growth hormone; SDS, standard deviation score; MPH, mid-parental height; DiffMPH, difference in SD score between the height of the girl and the heights of her parents.

**Suppl Table 1b.** Auxology from GH-start for the **young** subgroup versus dose for the **PP** population versus Swedish references {1,2,3,4}.

| variabler                                                                                                                                                                                                                                                                                                                                                                                                                                                                                                                                                                  | Dose 33 µg<br>(n=25)                             | Dose 67 µg<br>(n=28)                             | p-value | Difference between<br>groups<br>Mean (95% CI) | Effect<br>Size |
|----------------------------------------------------------------------------------------------------------------------------------------------------------------------------------------------------------------------------------------------------------------------------------------------------------------------------------------------------------------------------------------------------------------------------------------------------------------------------------------------------------------------------------------------------------------------------|--------------------------------------------------|--------------------------------------------------|---------|-----------------------------------------------|----------------|
| <b>At GH start</b>                                                                                                                                                                                                                                                                                                                                                                                                                                                                                                                                                         |                                                  |                                                  |         |                                               |                |
| <b>Age (yrs)</b>                                                                                                                                                                                                                                                                                                                                                                                                                                                                                                                                                           | 5.83 (1.41)<br>5.52 (3.04; 8.61)<br>n=25         | 5.81 (1.79)<br>5.74 (3.15; 8.89)<br>n=28         | 0.98    | 0.015 (-0.894; 0.921)                         | 0.009          |
| <b>Height<sub>SDS</sub></b>                                                                                                                                                                                                                                                                                                                                                                                                                                                                                                                                                | -2.80 (0.73)<br>-2.84 (-3.97; -1.13)<br>n=25     | -2.86 (0.81)<br>-2.81 (-5.39; -1.52)<br>n=28     | 0.77    | 0.059 (-0.362; 0.496)                         | 0.076          |
| <b>Diff MPH<sub>SDS</sub></b>                                                                                                                                                                                                                                                                                                                                                                                                                                                                                                                                              | -2.51 (0.91)<br>-2.35 (-4.12; -0.56)<br>n=25     | -2.66 (0.97)<br>-2.52 (-4.5; -1.08)<br>n=28      | 0.56    | 0.150 (-0.364; 0.668)                         | 0.160          |
| <b>+ 1 yr All prepubertal</b>                                                                                                                                                                                                                                                                                                                                                                                                                                                                                                                                              |                                                  |                                                  |         |                                               |                |
| <b>Average GH dose<br/>(µg/kg/day)</b>                                                                                                                                                                                                                                                                                                                                                                                                                                                                                                                                     | 35.1 (3.9)<br>35.5 (25.5; 41.6)<br>n=25          | 54.3 (6.0)<br>54.9 (39.4; 66.4)<br>n=28          | <.0001  | -19.2 (-22.1; -16.4)                          | 3.75           |
| <b>Height<sub>SDS</sub></b>                                                                                                                                                                                                                                                                                                                                                                                                                                                                                                                                                | -2.27 (0.74)<br>-2.26 (-3.57; -0.66)<br>n=25     | -2.00 (0.79)<br>-1.9 (-4.35; -0.51)<br>n=28      | 0.22    | -0.269 (-0.691; 0.161)                        | 0.349          |
| <b>At puberty start</b>                                                                                                                                                                                                                                                                                                                                                                                                                                                                                                                                                    |                                                  |                                                  |         |                                               |                |
| <b>Age (yrs)</b>                                                                                                                                                                                                                                                                                                                                                                                                                                                                                                                                                           | 14.6 (1.2)<br>14.5 (12.5; 16.9)<br>n=25          | 12.8 (1.2)<br>13.1 (10.6; 14.9)<br>n=28          | <.0001  | 1.80 (1.13; 2.44)                             | 1.52           |
| <b>Height<sub>SDS</sub></b>                                                                                                                                                                                                                                                                                                                                                                                                                                                                                                                                                | -0.990 (0.769)<br>-0.962 (-2.645; 0.267)<br>n=25 | -0.513 (1.026)<br>-0.407 (-3.022; 1.258)<br>n=28 | 0.067   | -0.477 (-0.980; 0.033)                        | 0.521          |
| <b>Diff MPH<sub>SDS</sub></b>                                                                                                                                                                                                                                                                                                                                                                                                                                                                                                                                              | -0.700 (0.909)<br>-0.528 (-2.791; 0.798)<br>n=25 | -0.314 (1.045)<br>-0.263 (-2.412; 1.794)<br>n=28 | 0.16    | -0.386 (-0.923; 0.159)                        | 0.392          |
| <b>Average GH dose<br/>Pre puberty<br/>(µg/kg/day)</b>                                                                                                                                                                                                                                                                                                                                                                                                                                                                                                                     | 34.0 (1.7)<br>33.8 (30.8; 38.4)<br>n=25          | 58.8 (4.3)<br>59.5 (46.7; 65.4)<br>n=28          | <.0001  | -24.8 (-26.6; -22.9)                          | 7.38           |
| <b>Gain in height<sub>SDS</sub><br/>GH start - Puberty onset</b>                                                                                                                                                                                                                                                                                                                                                                                                                                                                                                           | 1.81 (0.62)<br>1.71 (0.61; 3.4)<br>n=25          | 2.34 (0.79)<br>2.29 (0.81; 4.38)<br>n=28         | 0.0086  | -0.536 (-0.926; -0.140)                       | 0.747          |
| <p>For continuous variables Mean (SD) / Median (Min; Max) / n= is presented.<br/> For comparison between groups the Fisher's Non Parametric Permutation Test was used for continuous variables.<br/> The confidence interval for the mean difference between groups is based on Fishers non-parametric permutation test.<br/> Effect size is absolute difference in mean / pooled SD.<br/> GH, growth hormone; SDS, standard deviation score; MPH, mid-parental height; DiffMPH, difference in SD score between the height of the girl and the heights of her parents.</p> |                                                  |                                                  |         |                                               |                |

Suppl Table 1c Auxology at adult height for the **young** subgroup versus dose in the **PP** population versus the Swedish references [1,2,3,4]..

| Variables                                                                                                                                                                                                                                                                                                                                                                                                                                                                                                                                                                 | Dose 33 µg<br>(n=25)                           | Dose 67 µg<br>(n=28)                         | p-value | Difference between<br>groups<br>Mean (95% CI) | Effect<br>Size |
|---------------------------------------------------------------------------------------------------------------------------------------------------------------------------------------------------------------------------------------------------------------------------------------------------------------------------------------------------------------------------------------------------------------------------------------------------------------------------------------------------------------------------------------------------------------------------|------------------------------------------------|----------------------------------------------|---------|-----------------------------------------------|----------------|
| <b>At adult height</b>                                                                                                                                                                                                                                                                                                                                                                                                                                                                                                                                                    |                                                |                                              |         |                                               |                |
| <b>Age (yrs)</b>                                                                                                                                                                                                                                                                                                                                                                                                                                                                                                                                                          | 17.3 (1.2)<br>17 (15.6; 21.4)<br>n=25          | 16.3 (1.1)<br>16.1 (14.7; 19.8)<br>n=28      | 0.0015  | 1.06 (0.41; 1.72)                             | 0.891          |
| <b>Adult height (cm)</b>                                                                                                                                                                                                                                                                                                                                                                                                                                                                                                                                                  | 154.3 (4.9)<br>155.5 (146; 165.4)<br>n=25      | 157.0 (6.6)<br>157.2 (145.1; 168.3)<br>n=28  | 0.11    | -2.67 (-5.95; 0.62)                           | 0.456          |
| <b>Height<sub>SDS</sub></b>                                                                                                                                                                                                                                                                                                                                                                                                                                                                                                                                               | -2.18 (0.81)<br>-1.99 (-3.55; -0.36)<br>n=25   | -1.74 (1.08)<br>-1.71 (-3.7; 0.12)<br>n=28   | 0.11    | -0.440 (-0.978; 0.102)                        | 0.456          |
| <b>Diff MPH<sub>SDS</sub></b>                                                                                                                                                                                                                                                                                                                                                                                                                                                                                                                                             | -1.89 (0.81)<br>-1.84 (-3.58; -0.67)<br>n=25   | -1.54 (1.02)<br>-1.51 (-4.07; 0.49)<br>n=28  | 0.18    | -0.349 (-0.858; 0.167)                        | 0.377          |
| <b>Gain in Height<sub>SDS</sub><br/>Puberty onset - Adult<br/>height</b>                                                                                                                                                                                                                                                                                                                                                                                                                                                                                                  | -1.19 (0.39)<br>-1.17 (-1.88; -0.57)<br>n=25   | -1.22 (0.47)<br>-1.26 (-2.08; -0.54)<br>n=28 | 0.75    | 0.037 (-0.200; 0.274)                         | 0.086          |
| <b>Gain in height (cm)<br/>Puberty onset - Adult<br/>height</b>                                                                                                                                                                                                                                                                                                                                                                                                                                                                                                           | 3.51 (2.82)<br>2.8 (-0.2; 10.1)<br>n=25        | 9.09 (5.44)<br>7.9 (0.8; 20.5)<br>n=28       | <.0001  | -5.58 (-7.99; -3.13)                          | 1.27           |
| <b>Average GH dose<sub>Total</sub><br/>(µg/kg/day)</b>                                                                                                                                                                                                                                                                                                                                                                                                                                                                                                                    | 34.0 (1.8)<br>33.7 (31; 38.3)<br>n=25          | 57.9 (4.4)<br>58 (46.6; 65.9)<br>n=28        | <.0001  | -23.9 (-25.8; -22.0)                          | 7.02           |
| <b>Time on GH (yrs)</b>                                                                                                                                                                                                                                                                                                                                                                                                                                                                                                                                                   | 10.4 (1.6)<br>10.3 (7.2; 12.6)<br>n=25         | 9.43 (2.02)<br>9.72 (5.36; 13.87)<br>n=28    | 0.068   | 0.944 (-0.072; 1.958)                         | 0.518          |
| <b>Duration puberty (yrs)</b>                                                                                                                                                                                                                                                                                                                                                                                                                                                                                                                                             | 2.72 (1.08)<br>2.68 (0.98; 5.28)<br>n=25       | 3.45 (1.64)<br>3.31 (1.02; 9.26)<br>n=28     | 0.064   | -0.735 (-1.507; 0.039)                        | 0.523          |
| <b>Gain in height<sub>SDS</sub><br/>GH start - Adult height</b>                                                                                                                                                                                                                                                                                                                                                                                                                                                                                                           | 0.620 (0.679)<br>0.646 (-0.694; 1.691)<br>n=25 | 1.12 (0.79)<br>1 (-0.52; 3.27)<br>n=28       | 0.016   | -0.499 (-0.908; -0.092)                       | 0.672          |
| <p>For continuous variables Mean (SD) / Median (Min; Max) / n= is presented.<br/> For comparison between groups the Fisher's Non Parametric Permutation Test was used for continuous variables.<br/> The confidence interval for the mean difference between groups is based on Fishers non-parametric permutation test.<br/> Effect size is absolute difference in mean / pooled SD.<br/> GH, growth hormone; SDS, standard deviation score; MPH, midparental height; DiffMPH, difference in SD score between the height of the girl and the heights of her parents.</p> |                                                |                                              |         |                                               |                |

Suppl Table 2a. Pre-treatment characteristics for the **old** subgroup versus dose in the PP population versus Swedish references {1,2,3,4}.

| Variables                                                                                                                                                                                                                                                                                                                                                                                                                                                                                                                                                                                                                                                                                                                   | Dose 33 µg<br>(n=23)                             | Dose 67 µg<br>(n=13)                             | p-value | Difference between<br>groups<br>Mean (95% CI) | Effect<br>Size |
|-----------------------------------------------------------------------------------------------------------------------------------------------------------------------------------------------------------------------------------------------------------------------------------------------------------------------------------------------------------------------------------------------------------------------------------------------------------------------------------------------------------------------------------------------------------------------------------------------------------------------------------------------------------------------------------------------------------------------------|--------------------------------------------------|--------------------------------------------------|---------|-----------------------------------------------|----------------|
| <b>Karyotype 45X</b>                                                                                                                                                                                                                                                                                                                                                                                                                                                                                                                                                                                                                                                                                                        |                                                  |                                                  |         |                                               |                |
| <b>Mosaic</b>                                                                                                                                                                                                                                                                                                                                                                                                                                                                                                                                                                                                                                                                                                               | 7 (30.4%)                                        | 8 (61.5%)                                        |         |                                               |                |
| <b>Other</b>                                                                                                                                                                                                                                                                                                                                                                                                                                                                                                                                                                                                                                                                                                                | 1 (4.3%)                                         | 0 (0.0%)                                         |         |                                               |                |
| <b>Missing</b>                                                                                                                                                                                                                                                                                                                                                                                                                                                                                                                                                                                                                                                                                                              | 15 (65.2%)                                       | 5 (38.5%)                                        | 0.20    |                                               |                |
| <b>At birth</b>                                                                                                                                                                                                                                                                                                                                                                                                                                                                                                                                                                                                                                                                                                             |                                                  |                                                  |         |                                               |                |
| <b>GA<br/>(weeks)</b>                                                                                                                                                                                                                                                                                                                                                                                                                                                                                                                                                                                                                                                                                                       | 39.3 (1.5)<br>39 (36; 42)<br>n=22                | 38.6 (1.6)<br>39 (36; 41)<br>n=11                | 0.31    | 0.636 (-0.500; 1.778)                         | 0.427          |
| <b>Length<br/>(SDS)</b>                                                                                                                                                                                                                                                                                                                                                                                                                                                                                                                                                                                                                                                                                                     | -2.11 (1.59)<br>-1.93 (-5.49; 0.97)<br>n=23      | -2.13 (1.16)<br>-1.86 (-4.48; -0.35)<br>n=12     | 0.96    | 0.028 (-1.001; 1.062)                         | 0.019          |
| <b>Weight<br/>(SDS)</b>                                                                                                                                                                                                                                                                                                                                                                                                                                                                                                                                                                                                                                                                                                     | -1.69 (1.21)<br>-1.39 (-4.73; 0.42)<br>n=23      | -1.27 (1.12)<br>-0.98 (-3.07; 1.41)<br>n=13      | 0.32    | -0.418 (-1.250; 0.416)                        | 0.355          |
| <b>Mother height<br/>(SDS)</b>                                                                                                                                                                                                                                                                                                                                                                                                                                                                                                                                                                                                                                                                                              | -0.294 (0.665)<br>-0.182 (-1.456; 1.093)<br>n=23 | -0.064 (0.876)<br>-0.182 (-1.775; 1.571)<br>n=13 | 0.38    | -0.230 (-0.756; 0.305)                        | 0.308          |
| <b>Father height<br/>(SDS)</b>                                                                                                                                                                                                                                                                                                                                                                                                                                                                                                                                                                                                                                                                                              | -0.083 (0.909)<br>-0.101 (-1.713; 1.818)<br>n=22 | 0.186 (0.723)<br>0.144 (-1.023; 1.588)<br>n=13   | 0.38    | -0.269 (-0.858; 0.328)                        | 0.318          |
| <b>MPH<br/>(SDS)</b>                                                                                                                                                                                                                                                                                                                                                                                                                                                                                                                                                                                                                                                                                                        | -0.273 (0.705)<br>-0.105 (-1.504; 0.873)<br>n=22 | 0.076 (0.739)<br>0.001 (-1.547; 1.058)<br>n=13   | 0.18    | -0.349 (-0.855; 0.157)                        | 0.486          |
| <b>DiffMPH<br/>(SDS)</b>                                                                                                                                                                                                                                                                                                                                                                                                                                                                                                                                                                                                                                                                                                    | -1.84 (1.64)<br>-1.57 (-5.89; 0.96)<br>n=22      | -2.34 (1.22)<br>-2.39 (-4.4; -1.03)<br>n=12      | 0.36    | 0.504 (-0.597; 1.590)                         | 0.334          |
| <b>At GH-start</b>                                                                                                                                                                                                                                                                                                                                                                                                                                                                                                                                                                                                                                                                                                          |                                                  |                                                  |         |                                               |                |
| <b>Pre treatment height velocity,<br/>the years before (cm/year)</b>                                                                                                                                                                                                                                                                                                                                                                                                                                                                                                                                                                                                                                                        | 3.62 (0.97)<br>3.55 (1.48; 5.01)<br>n=23         | 3.76 (0.65)<br>3.84 (2.82; 4.5)<br>n=10          | 0.70    | -0.140 (-0.826; 0.517)                        | 0.158          |
| <p>For categorical variables n (%) is presented.<br/> For continuous variables Mean (SD) / Median (Min; Max) / n= is presented.<br/> For comparison between groups Chi Square Exact test was used for non-ordered categorical variables and the Fisher's Non Parametric Permutation Test was used for continuous variables.<br/> The confidence interval for the mean difference between groups is based on Fishers non-parametric permutation test.<br/> Effect size is absolute difference in mean / pooled SD.<br/> GA, gestational age; GH, growth hormone; SDS, standard deviation score; MPH, mid-parental height; DiffMPH, difference in SD score between the height of the girl and the heights of her parents.</p> |                                                  |                                                  |         |                                               |                |

Suppl Table 2b. Auxology from GH-start for the **old** subgroup versus dose for the **PP** population versus Swedish references {1,2,3,4}.

| variabler                                                                                                                                                                                                                                                                                                                                                                                                                                                                                                                                                                  | Dose 33 µg<br>(n=23)                         | Dose 67 µg<br>(n=13)                              | p-value | Difference between<br>groups<br>Mean (95% CI) | Effect<br>Size |
|----------------------------------------------------------------------------------------------------------------------------------------------------------------------------------------------------------------------------------------------------------------------------------------------------------------------------------------------------------------------------------------------------------------------------------------------------------------------------------------------------------------------------------------------------------------------------|----------------------------------------------|---------------------------------------------------|---------|-----------------------------------------------|----------------|
| <b>At GH start</b>                                                                                                                                                                                                                                                                                                                                                                                                                                                                                                                                                         |                                              |                                                   |         |                                               |                |
| <b>Age (yrs)</b>                                                                                                                                                                                                                                                                                                                                                                                                                                                                                                                                                           | 11.8 (2.0)<br>11.2 (9; 15.9)<br>n=23         | 11.4 (1.6)<br>10.7 (9.2; 14.8)<br>n=13            | 0.61    | 0.331 (-0.931; 1.645)                         | 0.179          |
| <b>Height<sub>SDS</sub></b>                                                                                                                                                                                                                                                                                                                                                                                                                                                                                                                                                | -2.83 (0.76)<br>-2.74 (-4.43; -1.36)<br>n=23 | -2.82 (0.57)<br>-2.93 (-3.96; -1.44)<br>n=13      | 0.98    | -0.007 (-0.490; 0.479)                        | 0.011          |
| <b>Diff MPH<sub>SDS</sub></b>                                                                                                                                                                                                                                                                                                                                                                                                                                                                                                                                              | -2.55 (0.80)<br>-2.44 (-3.86; -0.86)<br>n=22 | -2.89 (0.81)<br>-2.86 (-4.01; -1.44)<br>n=13      | 0.22    | 0.348 (-0.231; 0.920)                         | 0.434          |
| <b>+ 1 yr All prepubertal</b>                                                                                                                                                                                                                                                                                                                                                                                                                                                                                                                                              |                                              |                                                   |         |                                               |                |
| <b>Average GH dose<br/>(µg/kg/day)</b>                                                                                                                                                                                                                                                                                                                                                                                                                                                                                                                                     | 33.4 (3.3)<br>33.5 (26.7; 40)<br>n=23        | 56.5 (4.1)<br>56.1 (48.2; 62.5)<br>n=13           | <.0001  | -23.2 (-25.7; -20.6)                          | 6.41           |
| <b>Height<sub>SDS</sub></b>                                                                                                                                                                                                                                                                                                                                                                                                                                                                                                                                                | -2.27 (0.79)<br>-2.35 (-3.87; -0.81)<br>n=20 | -1.75 (0.61)<br>-1.77 (-2.83; -0.41)<br>n=13      | 0.058   | -0.518 (-1.048; 0.018)                        | 0.714          |
| <b>At puberty start</b>                                                                                                                                                                                                                                                                                                                                                                                                                                                                                                                                                    |                                              |                                                   |         |                                               |                |
| <b>Age (yrs)</b>                                                                                                                                                                                                                                                                                                                                                                                                                                                                                                                                                           | 15.0 (1.6)<br>15.3 (11.2; 16.8)<br>n=23      | 14.1 (1.7)<br>14.4 (11.4; 16.6)<br>n=13           | 0.12    | 0.910 (-0.248; 2.025)                         | 0.565          |
| <b>Height<sub>SDS</sub></b>                                                                                                                                                                                                                                                                                                                                                                                                                                                                                                                                                | -1.40 (0.52)<br>-1.52 (-2.28; -0.43)<br>n=23 | -0.776 (0.607)<br>-0.575 (-1.771; -0.065)<br>n=13 | 0.0022  | -0.624 (-1.023; -0.225)                       | 1.13           |
| <b>Diff MPH<sub>SDS</sub></b>                                                                                                                                                                                                                                                                                                                                                                                                                                                                                                                                              | -1.14 (0.79)<br>-1.44 (-2.14; 0.67)<br>n=22  | -0.851 (0.679)<br>-0.943 (-1.845; 0.353)<br>n=13  | 0.29    | -0.285 (-0.815; 0.266)                        | 0.378          |
| <b>Average GH dose<br/>Pre puberty<br/>(µg/kg/day)</b>                                                                                                                                                                                                                                                                                                                                                                                                                                                                                                                     | 33.6 (2.2)<br>33.1 (29.8; 39.2)<br>n=23      | 58.9 (4.2)<br>60 (49.5; 63.4)<br>n=13             | <.0001  | -25.3 (-27.5; -23.2)                          | 8.29           |
| <b>Gain in height<sub>SDS</sub><br/>GH start - Puberty onset</b>                                                                                                                                                                                                                                                                                                                                                                                                                                                                                                           | 1.43 (0.75)<br>1.55 (0.37; 2.87)<br>n=23     | 2.04 (0.65)<br>2.16 (0.86; 2.88)<br>n=13          | 0.019   | -0.616 (-1.117; -0.114)                       | 0.858          |
| <p>For continuous variables Mean (SD) / Median (Min; Max) / n= is presented.<br/> For comparison between groups the Fisher's Non Parametric Permutation Test was used for continuous variables.<br/> The confidence interval for the mean difference between groups is based on Fishers non-parametric permutation test.<br/> Effect size is absolute difference in mean / pooled SD.<br/> GH, growth hormone; SDS, standard deviation score; MPH, mid-parental height; DiffMPH, difference in SD score between the height of the girl and the heights of her parents.</p> |                                              |                                                   |         |                                               |                |

Suppl Table 2c Auxology at adult height for the **old** subgroup versus dose in the PP population versus the Swedish references [1,2,3,4]..

| Variables                                                                                                                                                                                                                                                                                                                                                                                                                                                                                                                                                                                                         | Dose 33 µg<br>(n=23)                            | Dose 67 µg<br>(n=13)                           | p-value | Difference between<br>groups<br>Mean (95% CI) | Effect<br>Size |
|-------------------------------------------------------------------------------------------------------------------------------------------------------------------------------------------------------------------------------------------------------------------------------------------------------------------------------------------------------------------------------------------------------------------------------------------------------------------------------------------------------------------------------------------------------------------------------------------------------------------|-------------------------------------------------|------------------------------------------------|---------|-----------------------------------------------|----------------|
| <b>At adult height</b>                                                                                                                                                                                                                                                                                                                                                                                                                                                                                                                                                                                            |                                                 |                                                |         |                                               |                |
| <b>Age (yrs)</b>                                                                                                                                                                                                                                                                                                                                                                                                                                                                                                                                                                                                  | 18.3 (1.5)<br>18.2 (15.9; 23.5)<br>n=23         | 17.2 (1.3)<br>17.6 (14.8; 18.9)<br>n=13        | 0.030   | 1.05 (0.10; 2.08)                             | 0.741          |
| <b>Adult height (cm)</b>                                                                                                                                                                                                                                                                                                                                                                                                                                                                                                                                                                                          | 157.0 (4.1)<br>156.7 (145.7; 164)<br>n=23       | 159.4 (3.9)<br>159.7 (150.4; 165.5)<br>n=13    | 0.090   | -2.44 (-5.34; 0.37)                           | 0.605          |
| <b>Height<sub>SDS</sub></b>                                                                                                                                                                                                                                                                                                                                                                                                                                                                                                                                                                                       | -1.75 (0.67)<br>-1.79 (-3.6; -0.59)<br>n=23     | -1.35 (0.65)<br>-1.3 (-2.83; -0.34)<br>n=13    | 0.090   | -0.400 (-0.877; 0.061)                        | 0.604          |
| <b>Diff MPH<sub>SDS</sub></b>                                                                                                                                                                                                                                                                                                                                                                                                                                                                                                                                                                                     | -1.47 (0.95)<br>-1.53 (-3.92; 0.03)<br>n=22     | -1.42 (0.84)<br>-1.44 (-2.71; -0.18)<br>n=13   | 0.90    | -0.043 (-0.686; 0.593)                        | 0.048          |
| <b>Gain in Height<sub>SDS</sub><br/>Puberty onset - Adult<br/>height</b>                                                                                                                                                                                                                                                                                                                                                                                                                                                                                                                                          | -0.349 (0.578)<br>-0.38 (-1.781; 1.321)<br>n=23 | -0.573 (0.503)<br>-0.69 (-1.332; 0.24)<br>n=13 | 0.26    | 0.223 (-0.160; 0.612)                         | 0.404          |
| <b>Gain in height (cm)<br/>Puberty onset - Adult<br/>height</b>                                                                                                                                                                                                                                                                                                                                                                                                                                                                                                                                                   | 7.76 (4.96)<br>8.2 (1.1; 20)<br>n=23            | 9.08 (5.14)<br>6.6 (3.8; 20.1)<br>n=13         | 0.45    | -1.32 (-4.79; 2.26)                           | 0.263          |
| <b>Average GH dose<sub>Total</sub><br/>(µg/kg/day)</b>                                                                                                                                                                                                                                                                                                                                                                                                                                                                                                                                                            | 33.4 (1.5)<br>33.1 (31.2; 36.7)<br>n=23         | 59.2 (3.6)<br>60.2 (52.3; 63.4)<br>n=13        | <.0001  | -25.8 (-27.6; -24.1)                          | 10.4           |
| <b>Time on GH (yrs)</b>                                                                                                                                                                                                                                                                                                                                                                                                                                                                                                                                                                                           | 5.37 (1.72)<br>6.01 (2.69; 8.29)<br>n=23        | 5.15 (1.24)<br>5.36 (2.62; 7.14)<br>n=13       | 0.69    | 0.223 (-0.893; 1.314)                         | 0.142          |
| <b>Duration puberty (yrs)</b>                                                                                                                                                                                                                                                                                                                                                                                                                                                                                                                                                                                     | 3.32 (1.70)<br>3.43 (0.98; 8.15)<br>n=23        | 3.18 (0.95)<br>2.77 (1.99; 5.37)<br>n=13       | 0.82    | 0.138 (-0.842; 1.194)                         | 0.093          |
| <b>Gain in height<sub>SDS</sub><br/>GH start - Adult height</b>                                                                                                                                                                                                                                                                                                                                                                                                                                                                                                                                                   | 1.08 (0.84)<br>1.05 (-1.32; 2.39)<br>n=23       | 1.47 (0.62)<br>1.52 (-0.19; 2.23)<br>n=13      | 0.14    | -0.393 (-0.941; 0.120)                        | 0.513          |
| <p>For continuous variables Mean (SD) / Median (Min; Max) / n= is presented.<br/>           For comparison between groups the Fisher's Non Parametric Permutation Test was used for continuous variables.<br/>           The confidence interval for the mean difference between groups is based on Fishers non-parametric permutation test.<br/>           Effect size is absolute difference in mean / pooled SD.<br/>           GH, growth hormone; SDS, standard deviation score; MPH, midparental height; DiffMPH, difference in SD score between the height of the girl and the heights of her parents.</p> |                                                 |                                                |         |                                               |                |



Suppl Table 3a. Pre-treatment characteristics for all girls versus dose in the ITT population, versus Swedish references [1,2,3,4].

| Variables                                                                                                                                                                                                                                                                                                                                                                                                                                                                                                                                                                                                                                                                                                                   | Dose 33 µg<br>(n=67)                             | Dose 67 µg<br>(n=65)                             | p-value | Difference between<br>groups<br>Mean (95% CI) | Effect<br>Size |
|-----------------------------------------------------------------------------------------------------------------------------------------------------------------------------------------------------------------------------------------------------------------------------------------------------------------------------------------------------------------------------------------------------------------------------------------------------------------------------------------------------------------------------------------------------------------------------------------------------------------------------------------------------------------------------------------------------------------------------|--------------------------------------------------|--------------------------------------------------|---------|-----------------------------------------------|----------------|
| <b>Karyotype 45X</b>                                                                                                                                                                                                                                                                                                                                                                                                                                                                                                                                                                                                                                                                                                        | 38 (58.5%)                                       | 35 (53.8%)                                       |         |                                               |                |
| <b>Mosaic</b>                                                                                                                                                                                                                                                                                                                                                                                                                                                                                                                                                                                                                                                                                                               | 3 (4.6%)                                         | 2 (3.1%)                                         |         |                                               |                |
| <b>Other</b>                                                                                                                                                                                                                                                                                                                                                                                                                                                                                                                                                                                                                                                                                                                | 24 (36.9%)                                       | 28 (43.1%)                                       | 0.74    |                                               |                |
| <b>Missing</b>                                                                                                                                                                                                                                                                                                                                                                                                                                                                                                                                                                                                                                                                                                              | 2                                                | 0                                                |         |                                               |                |
| <b>At birth</b>                                                                                                                                                                                                                                                                                                                                                                                                                                                                                                                                                                                                                                                                                                             |                                                  |                                                  |         |                                               |                |
| <b>GA<br/>(weeks)</b>                                                                                                                                                                                                                                                                                                                                                                                                                                                                                                                                                                                                                                                                                                       | 39.0 (1.7)<br>39 (34; 42)<br>n=65                | 38.4 (2.0)<br>39 (33; 42)<br>n=62                | 0.10    | 0.551<br>(-0.097; 1.187)                      | 0.301          |
| <b>Length<br/>(SDS)</b>                                                                                                                                                                                                                                                                                                                                                                                                                                                                                                                                                                                                                                                                                                     | -2.25 (1.42)<br>-2.09 (-5.49; 0.97)<br>n=67      | -1.85 (1.18)<br>-1.73 (-4.48; 0.31)<br>n=64      | 0.082   | -0.403<br>(-0.859; 0.054)                     | 0.308          |
| <b>Weight<br/>(SDS)</b>                                                                                                                                                                                                                                                                                                                                                                                                                                                                                                                                                                                                                                                                                                     | -1.55 (1.25)<br>-1.3 (-5.11; 0.42)<br>n=67       | -1.13 (1.17)<br>-1.04 (-3.92; 1.7)<br>n=65       | 0.049   | -0.424<br>(-0.838; -0.001)                    | 0.350          |
| <b>Mother height<br/>(SDS)</b>                                                                                                                                                                                                                                                                                                                                                                                                                                                                                                                                                                                                                                                                                              | -0.247 (0.821)<br>-0.182 (-2.731; 1.3)<br>n=66   | -0.008 (1.117)<br>-0.182 (-2.094; 2.633)<br>n=65 | 0.17    | -0.239<br>(-0.575; 0.104)                     | 0.244          |
| <b>Father height<br/>(SDS)</b>                                                                                                                                                                                                                                                                                                                                                                                                                                                                                                                                                                                                                                                                                              | -0.092 (0.868)<br>-0.066 (-1.79; 1.818)<br>n=64  | -0.050 (1.039)<br>0.144 (-3.326; 1.741)<br>n=65  | 0.80    | -0.042<br>(-0.373; 0.291)                     | 0.043          |
| <b>MPH<br/>(SDS)</b>                                                                                                                                                                                                                                                                                                                                                                                                                                                                                                                                                                                                                                                                                                        | -0.218 (0.820)<br>-0.238 (-2.046; 1.863)<br>n=64 | -0.036 (1.022)<br>-0.16 (-3.356; 2.066)<br>n=65  | 0.27    | -0.182<br>(-0.506; 0.141)                     | 0.196          |
| <b>DiffMPH<br/>(SDS)</b>                                                                                                                                                                                                                                                                                                                                                                                                                                                                                                                                                                                                                                                                                                    | -2.08 (1.58)<br>-1.78 (-5.89; 1.48)<br>n=64      | -1.83 (1.33)<br>-1.83 (-4.4; 0.93)<br>n=64       | 0.33    | -0.247<br>(-0.756; 0.257)                     | 0.169          |
| <p>For categorical variables n (%) is presented.<br/> For continuous variables Mean (SD) / Median (Min; Max) / n= is presented.<br/> For comparison between groups Chi Square Exact test was used for non-ordered categorical variables and the Fisher's Non Parametric Permutation Test was used for continuous variables.<br/> The confidence interval for the mean difference between groups is based on Fishers non-parametric permutation test.<br/> Effect size is absolute difference in mean / pooled SD.<br/> GA, gestational age; GH, growth hormone; SDS, standard deviation score; MPH, mid-parental height; DiffMPH, difference in SD score between the height of the girl and the heights of her parents.</p> |                                                  |                                                  |         |                                               |                |

Suppl Table 3b. Auxology from GH-start for **all girls** versus dose for the ITT population versus Swedish references {1,2,3,4}.

| Variables                                                                                                                                                                                                                                                                                                                                                                                                                                                                                                                                                             | Dose 33 µg<br>(n=67)                         | Dose 67 µg<br>(n=65)                             | p-value | Difference<br>between groups<br>Mean (95% CI) | Effect<br>Size |
|-----------------------------------------------------------------------------------------------------------------------------------------------------------------------------------------------------------------------------------------------------------------------------------------------------------------------------------------------------------------------------------------------------------------------------------------------------------------------------------------------------------------------------------------------------------------------|----------------------------------------------|--------------------------------------------------|---------|-----------------------------------------------|----------------|
| <b>At GH start</b>                                                                                                                                                                                                                                                                                                                                                                                                                                                                                                                                                    |                                              |                                                  |         |                                               |                |
| Age (yrs)                                                                                                                                                                                                                                                                                                                                                                                                                                                                                                                                                             | 8.84 (3.48)<br>9 (3.04; 15.87)<br>n=67       | 7.29 (3.04)<br>6.96 (3.07; 14.77)<br>n=65        | 0.0088  | 1.55<br>(0.41; 2.67)                          | 0.475          |
| Height <sub>SDS</sub>                                                                                                                                                                                                                                                                                                                                                                                                                                                                                                                                                 | -2.79 (0.77)<br>-2.78 (-4.43; -1.13)<br>n=67 | -2.79 (0.67)<br>-2.79 (-5.39; -1.44)<br>n=65     | 0.96    | 0.007<br>(-0.240; 0.250)                      | 0.009          |
| Diff MPH <sub>SDS</sub>                                                                                                                                                                                                                                                                                                                                                                                                                                                                                                                                               | -2.54 (0.86)<br>-2.4 (-4.23; -0.56)<br>n=64  | -2.76 (0.87)<br>-2.73 (-4.5; -1.08)<br>n=65      | 0.15    | 0.220<br>(-0.081; 0.520)                      | 0.254          |
| <b>+ 1 yr All prepubertal</b>                                                                                                                                                                                                                                                                                                                                                                                                                                                                                                                                         |                                              |                                                  |         |                                               |                |
| Average GH dose<br>(µg/kg/day)                                                                                                                                                                                                                                                                                                                                                                                                                                                                                                                                        | 34.8 (4.8)<br>34.2 (25.5; 61)<br>n=67        | 54.7 (7.2)<br>56.1 (28; 71.4)<br>n=65            | <.0001  | -19.9<br>(-22.0; -17.8)                       | 3.27           |
| Height <sub>SDS</sub>                                                                                                                                                                                                                                                                                                                                                                                                                                                                                                                                                 | -2.31 (0.75)<br>-2.29 (-3.87; -0.66)<br>n=61 | -1.88 (0.68)<br>-1.8 (-4.35; -0.41)<br>n=65      | 0.0010  | -0.427<br>(-0.676; -0.173)                    | 0.600          |
| <b>At puberty start</b>                                                                                                                                                                                                                                                                                                                                                                                                                                                                                                                                               |                                              |                                                  |         |                                               |                |
| Age (yrs)                                                                                                                                                                                                                                                                                                                                                                                                                                                                                                                                                             | 14.9 (1.4)<br>15 (11.2; 18)<br>n=67          | 13.4 (1.6)<br>13.7 (9.1; 16.8)<br>n=65           | <.0001  | 1.58<br>(1.07; 2.10)                          | 1.07           |
| Height <sub>SDS</sub>                                                                                                                                                                                                                                                                                                                                                                                                                                                                                                                                                 | -1.29 (0.83)<br>-1.36 (-3.43; 0.27)<br>n=67  | -0.514 (0.897)<br>-0.41 (-3.022; 1.258)<br>n=65  | <.0001  | -0.772<br>(-1.069; -0.477)                    | 0.894          |
| Diff MPH <sub>SDS</sub>                                                                                                                                                                                                                                                                                                                                                                                                                                                                                                                                               | -1.07 (1.01)<br>-1.22 (-3.39; 0.8)<br>n=64   | -0.478 (1.008)<br>-0.504 (-2.412; 1.829)<br>n=65 | 0.0007  | -0.592<br>(-0.944; -0.243)                    | 0.588          |
| Average GH dose<br>Pre puberty<br>(µg/kg/day)                                                                                                                                                                                                                                                                                                                                                                                                                                                                                                                         | 34.4 (2.9)<br>33.8 (29.8; 46.7)<br>n=65      | 57.2 (5.9)<br>58.2 (37.7; 68.9)<br>n=65          | <.0001  | -22.8<br>(-24.4; -21.2)                       | 4.89           |
| Gain in height <sub>SDS</sub><br>GH start - Puberty onset                                                                                                                                                                                                                                                                                                                                                                                                                                                                                                             | 1.50 (0.80)<br>1.54 (0; 3.43)<br>n=67        | 2.28 (0.73)<br>2.26 (0.81; 4.38)<br>n=65         | <.0001  | -0.778<br>(-1.041; -0.516)                    | 1.02           |
| <p>For continuous variables Mean (SD) / Median (Min; Max) / n= is presented.<br/> For comparison between groups the Fisher's Non Parametric Permutation Test was used for continuous variables. The confidence interval for the mean difference between groups is based on Fishers non-parametric permutation test.<br/> Effect size is absolute difference in mean / pooled SD.<br/> GH, growth hormone; SDS, standard deviation score; MPH, mid-parental height; DiffMPH, difference in SD score between the height of the girl and the heights of her parents.</p> |                                              |                                                  |         |                                               |                |

Suppl Table 3c Auxology at adult height for all girls versus dose in the ITT population versus the Swedish references {1,2,3,4}

| Variables                                                            | Dose 33 µg<br>(n=67)                            | Dose 67 µg<br>(n=65)                        | p-value | Difference<br>between<br>groups<br>Mean (95% CI) | Effect<br>Size |
|----------------------------------------------------------------------|-------------------------------------------------|---------------------------------------------|---------|--------------------------------------------------|----------------|
| <b>At adult height</b>                                               |                                                 |                                             |         |                                                  |                |
| <b>Age (yrs)</b>                                                     | 17.9 (1.7)<br>17.5 (15.6; 25.9)<br>n=67         | 16.4 (1.2)<br>16.4 (13.4; 19.8)<br>n=65     | <.0001  | 1.44<br>(0.92; 1.96)                             | 0.948          |
| <b>Adult height (cm)</b>                                             | 155.1 (5.4)<br>155.7 (143.7; 169.2)<br>n=67     | 158.0 (5.4)<br>158.1 (145.1; 168.3)<br>n=65 | 0.0026  | -2.82<br>(-4.66; -1.00)                          | 0.524          |
| <b>Height<sub>SDS</sub></b>                                          | -2.05 (0.89)<br>-1.96 (-3.93; 0.27)<br>n=67     | -1.58 (0.88)<br>-1.56 (-3.7; 0.12)<br>n=65  | 0.0026  | -0.464<br>(-0.767; -0.165)                       | 0.524          |
| <b>Diff MPH<sub>SDS</sub></b>                                        | -1.84 (0.98)<br>-1.84 (-4.53; 0.03)<br>n=64     | -1.55 (0.89)<br>-1.64 (-4.07; 0.49)<br>n=65 | 0.071   | -0.299<br>(-0.625; 0.028)                        | 0.320          |
| <b>Gain in Height<sub>SDS</sub><br/>Puberty onset - Adult height</b> | -0.761 (0.665)<br>-0.79 (-1.878; 1.626)<br>n=67 | -1.07 (0.65)<br>-1.11 (-2.63; 0.66)<br>n=65 | 0.0096  | 0.308<br>(0.082; 0.534)                          | 0.468          |
| <b>Gain in height (cm)<br/>Puberty onset - Adult height</b>          | 5.23 (4.72)<br>3.7 (-0.2; 21.1)<br>n=67         | 8.10 (5.95)<br>6.2 (0; 26.8)<br>n=65        | 0.0033  | -2.87<br>(-4.74; -1.00)                          | 0.536          |
| <b>Average GH dose<sub>Total</sub><br/>(µg/kg/day)</b>               | 34.7 (3.6)<br>33.7 (30.3; 48.1)<br>n=67         | 55.8 (6.4)<br>56.4 (37.3; 69.1)<br>n=65     | <.0001  | -21.1<br>(-22.8; -19.3)                          | 4.08           |
| <b>Time on GH (yrs)</b>                                              | 7.66 (3.07)<br>7.26 (1.99; 13.02)<br>n=67       | 8.22 (2.62)<br>8.03 (2.62; 13.87)<br>n=65   | 0.27    | -0.556<br>(-1.546; 0.436)                        | 0.195          |
| <b>Duration puberty (yrs)</b>                                        | 2.94 (1.55)<br>2.7 (0.61; 8.7)<br>n=67          | 3.08 (1.44)<br>3.05 (0; 9.26)<br>n=65       | 0.58    | -0.144<br>(-0.661; 0.378)                        | 0.096          |
| <b>Gain in height<sub>SDS</sub><br/>GH start - Adult height</b>      | 0.741 (0.825)<br>0.694 (-1.32; 2.664)<br>n=67   | 1.21 (0.71)<br>1.24 (-0.52; 3.27)<br>n=65   | 0.0006  | -0.470<br>(-0.740; -0.206)                       | 0.609          |

For continuous variables Mean (SD) / Median (Min; Max) / n= is presented.  
For comparison between groups the Fisher's Non Parametric Permutation Test was used for continuous variables.  
The confidence interval for the mean difference between groups is based on Fishers non-parametric permutation test.  
Effect size is absolute difference in mean / pooled SD.  
GH, growth hormone; SDS, standard deviation score; MPH, midparental height; DiffMPH, difference in SD score between the height of the girl and the heights of her parents.

Suppl Table 4a. Pre-treatment characteristics for all GH versus age group at GH-start in ITT population versus the Swedish references {1,2,3,4}.

| Variables                                                                                                                                                                                                                                                                                                                                                                                                                                                                                                                                                                                                                                                                                                                   | GH-start 3- <9<br>(n=79)                         | GH-start 9-<br>(n=53)                            | p-value | Difference<br>between groups<br>Mean (95% CI) | Effect<br>Size |
|-----------------------------------------------------------------------------------------------------------------------------------------------------------------------------------------------------------------------------------------------------------------------------------------------------------------------------------------------------------------------------------------------------------------------------------------------------------------------------------------------------------------------------------------------------------------------------------------------------------------------------------------------------------------------------------------------------------------------------|--------------------------------------------------|--------------------------------------------------|---------|-----------------------------------------------|----------------|
| <b>Karyotype 45X</b>                                                                                                                                                                                                                                                                                                                                                                                                                                                                                                                                                                                                                                                                                                        | 50 (64.9%)                                       | 23 (43.4%)                                       |         |                                               |                |
| <b>Mosaic</b>                                                                                                                                                                                                                                                                                                                                                                                                                                                                                                                                                                                                                                                                                                               | 3 (3.9%)                                         | 2 (3.8%)                                         |         |                                               |                |
| <b>Other</b>                                                                                                                                                                                                                                                                                                                                                                                                                                                                                                                                                                                                                                                                                                                | 24 (31.2%)                                       | 28 (52.8%)                                       | 0.038   |                                               |                |
| <b>Missing</b>                                                                                                                                                                                                                                                                                                                                                                                                                                                                                                                                                                                                                                                                                                              | 2                                                | 0                                                |         |                                               |                |
| <b>At birth</b>                                                                                                                                                                                                                                                                                                                                                                                                                                                                                                                                                                                                                                                                                                             |                                                  |                                                  |         |                                               |                |
| <b>GA<br/>(weeks)</b>                                                                                                                                                                                                                                                                                                                                                                                                                                                                                                                                                                                                                                                                                                       | 38.5 (2.0)<br>39 (33; 42)<br>n=77                | 39.0 (1.6)<br>39 (34; 42)<br>n=50                | 0.19    | -0.454<br>(-1.115; 0.207)                     | 0.247          |
| <b>Length<br/>(SDS)</b>                                                                                                                                                                                                                                                                                                                                                                                                                                                                                                                                                                                                                                                                                                     | -2.14 (1.31)<br>-2.09 (-5; 0.9)<br>n=79          | -1.92 (1.33)<br>-1.73 (-5.49; 0.97)<br>n=52      | 0.36    | -0.220<br>(-0.685; 0.251)                     | 0.167          |
| <b>Weight<br/>(SDS)</b>                                                                                                                                                                                                                                                                                                                                                                                                                                                                                                                                                                                                                                                                                                     | -1.33 (1.32)<br>-1.23 (-5.11; 1.7)<br>n=79       | -1.36 (1.09)<br>-1.2 (-4.73; 1.41)<br>n=53       | 0.88    | 0.032<br>(-0.400; 0.469)                      | 0.026          |
| <b>Mother height<br/>(SDS)</b>                                                                                                                                                                                                                                                                                                                                                                                                                                                                                                                                                                                                                                                                                              | -0.092 (1.103)<br>-0.182 (-2.731; 2.633)<br>n=79 | -0.183 (0.771)<br>-0.182 (-1.775; 1.73)<br>n=52  | 0.60    | 0.091<br>(-0.252; 0.440)                      | 0.092          |
| <b>Father height<br/>(SDS)</b>                                                                                                                                                                                                                                                                                                                                                                                                                                                                                                                                                                                                                                                                                              | -0.169 (1.014)<br>-0.03 (-3.326; 1.741)<br>n=79  | 0.084 (0.838)<br>0.052 (-1.79; 1.818)<br>n=50    | 0.15    | -0.253<br>(-0.590; 0.088)                     | 0.266          |
| <b>MPH<br/>(SDS)</b>                                                                                                                                                                                                                                                                                                                                                                                                                                                                                                                                                                                                                                                                                                        | -0.162 (1.021)<br>-0.238 (-3.356; 2.066)<br>n=79 | -0.069 (0.766)<br>-0.038 (-1.547; 1.775)<br>n=50 | 0.58    | -0.093<br>(-0.429; 0.238)                     | 0.100          |
| <b>DiffMPH<br/>(SDS)</b>                                                                                                                                                                                                                                                                                                                                                                                                                                                                                                                                                                                                                                                                                                    | -1.98 (1.50)<br>-2.02 (-5.79; 1.48)<br>n=79      | -1.92 (1.39)<br>-1.71 (-5.89; 0.96)<br>n=49      | 0.85    | -0.053<br>(-0.579; 0.473)                     | 0.037          |
| <p>For categorical variables n (%) is presented.<br/> For continuous variables Mean (SD) / Median (Min; Max) / n= is presented.<br/> For comparison between groups Chi Square Exact test was used for non-ordered categorical variables and the Fisher's Non Parametric Permutation Test was used for continuous variables.<br/> The confidence interval for the mean difference between groups is based on Fishers non-parametric permutation test.<br/> Effect size is absolute difference in mean / pooled SD.<br/> GA, gestational age; GH, growth hormone; SDS, standard deviation score; MPH, mid-parental height; DiffMPH, difference in SD score between the height of the girl and the heights of her parents.</p> |                                                  |                                                  |         |                                               |                |

Suppl Table 4b. Auxology from GH-start for all GH versus age group at GH-start in the ITT population versus the Swedish references {1,2,3,4}.

| Variables                                                                                                                                                                                                                                                                                                                                                                                                                                                                                                                                                   | GH-start 3- <9<br>(n=79)                         | GH-start 9-<br>(n=53)                        | p-value | Difference between<br>groups<br>Mean (95% CI) | Effect<br>Size |
|-------------------------------------------------------------------------------------------------------------------------------------------------------------------------------------------------------------------------------------------------------------------------------------------------------------------------------------------------------------------------------------------------------------------------------------------------------------------------------------------------------------------------------------------------------------|--------------------------------------------------|----------------------------------------------|---------|-----------------------------------------------|----------------|
| <b>At GH start</b>                                                                                                                                                                                                                                                                                                                                                                                                                                                                                                                                          |                                                  |                                              |         |                                               |                |
| <b>Age (yrs)</b>                                                                                                                                                                                                                                                                                                                                                                                                                                                                                                                                            | 5.74 (1.64)<br>5.52 (3.04; 8.9)<br>n=79          | 11.6 (1.9)<br>10.9 (9; 15.9)<br>n=53         | <.0001  | -5.82<br>(-6.43; -5.20)                       | 3.34           |
| <b>Height<sub>SDS</sub></b>                                                                                                                                                                                                                                                                                                                                                                                                                                                                                                                                 | -2.78 (0.74)<br>-2.78 (-5.39; -1.13)<br>n=79     | -2.81 (0.69)<br>-2.84 (-4.43; -1.36)<br>n=53 | 0.85    | 0.026<br>(-0.228; 0.274)                      | 0.036          |
| <b>Diff MPH<sub>SDS</sub></b>                                                                                                                                                                                                                                                                                                                                                                                                                                                                                                                               | -2.62 (0.92)<br>-2.59 (-4.5; -0.56)<br>n=79      | -2.70 (0.78)<br>-2.58 (-4.01; -0.86)<br>n=50 | 0.62    | 0.080<br>(-0.234; 0.394)                      | 0.092          |
| <b>+ 1 yr All prepubertal</b>                                                                                                                                                                                                                                                                                                                                                                                                                                                                                                                               |                                                  |                                              |         |                                               |                |
| <b>Average GH dose<sub>Year 1</sub><br/>(µg/kg/day)</b>                                                                                                                                                                                                                                                                                                                                                                                                                                                                                                     | 46.3 (11.3)<br>48.2 (25.5; 66.4)<br>n=79         | 41.9 (11.8)<br>35.8 (26.7; 71.4)<br>n=53     | 0.031   | 4.45<br>(0.43; 8.49)                          | 0.386          |
| <b>Height<sub>SDS</sub></b>                                                                                                                                                                                                                                                                                                                                                                                                                                                                                                                                 | -2.08 (0.74)<br>-2.07 (-4.35; -0.51)<br>n=79     | -2.10 (0.75)<br>-2.1 (-3.87; -0.41)<br>n=47  | 0.86    | 0.024<br>(-0.252; 0.294)                      | 0.032          |
| <b>At puberty start</b>                                                                                                                                                                                                                                                                                                                                                                                                                                                                                                                                     |                                                  |                                              |         |                                               |                |
| <b>Age (yrs)</b>                                                                                                                                                                                                                                                                                                                                                                                                                                                                                                                                            | 13.7 (1.6)<br>13.9 (9.1; 16.9)<br>n=79           | 14.8 (1.7)<br>15.2 (11.2; 18)<br>n=53        | 0.0003  | -1.06<br>(-1.62; -0.50)                       | 0.665          |
| <b>Height<sub>SDS</sub></b>                                                                                                                                                                                                                                                                                                                                                                                                                                                                                                                                 | -0.705 (0.987)<br>-0.649 (-3.184; 1.258)<br>n=79 | -1.20 (0.79)<br>-1.17 (-3.43; 0.3)<br>n=53   | 0.0029  | 0.499<br>(0.175; 0.821)                       | 0.546          |
| <b>Diff MPH<sub>SDS</sub></b>                                                                                                                                                                                                                                                                                                                                                                                                                                                                                                                               | -0.543 (1.095)<br>-0.477 (-3.394; 1.829)<br>n=79 | -1.13 (0.86)<br>-1.37 (-3.02; 0.68)<br>n=50  | 0.0014  | 0.590<br>(0.230; 0.957)                       | 0.584          |
| <b>Average GH dose<br/>Pre puberty<br/>(µg/kg/day)</b>                                                                                                                                                                                                                                                                                                                                                                                                                                                                                                      | 47.6 (11.9)<br>52 (30.3; 65.4)<br>n=79           | 43.0 (12.6)<br>35.7 (29.8; 68.9)<br>n=51     | 0.039   | 4.57<br>(0.23; 8.93)                          | 0.375          |
| <b>Gain in Height<sub>SDS</sub><br/>GH start - Puberty onset</b>                                                                                                                                                                                                                                                                                                                                                                                                                                                                                            | 2.07 (0.78)<br>2.15 (0.48; 4.38)<br>n=79         | 1.60 (0.89)<br>1.71 (0; 3.43)<br>n=53        | 0.0026  | 0.472<br>(0.179; 0.766)                       | 0.572          |
| For continuous variables Mean (SD) / Median (Min; Max) / n= is presented.<br>For comparison between groups the Fisher's Non Parametric Permutation Test was used for continuous variables.<br>The confidence interval for the mean difference between groups is based on Fishers non-parametric permutation test.<br>Effect size is absolute difference in mean / pooled SD.<br>GH, growth hormone; SDS, standard deviation score; MPH, mid-parental height; DiffMPH, difference in SD score between the height of the girl and the heights of her parents. |                                                  |                                              |         |                                               |                |

Suppl Table 4c. Auxology at adult height for **all GH** versus age group at GH-start in the ITT population versus the Swedish references {1,2,3,4}.

| Variables                                                            | GH-start 3- <9<br>(n=79)                       | GH-start 9-<br>(n=53)                           | p-value | Difference between<br>groups<br>Mean (95% CI) | Effect<br>Size |
|----------------------------------------------------------------------|------------------------------------------------|-------------------------------------------------|---------|-----------------------------------------------|----------------|
| <b>At adult height</b>                                               |                                                |                                                 |         |                                               |                |
| <b>Age (yrs)</b>                                                     | 16.6 (1.3)<br>16.5 (13.4; 21.4)<br>n=79        | 18.0 (1.8)<br>17.8 (14.8; 25.9)<br>n=53         | <.0001  | -1.41<br>(-1.93; -0.86)                       | 0.917          |
| <b>Adult height (cm)</b>                                             | 155.7 (5.8)<br>155.7 (143.7; 168.3)<br>n=79    | 157.7 (4.9)<br>158.1 (144; 169.2)<br>n=53       | 0.042   | -2.00<br>(-3.93; -0.09)                       | 0.364          |
| <b>Height<sub>SDS</sub></b>                                          | -1.95 (0.96)<br>-1.96 (-3.93; 0.12)<br>n=79    | -1.62 (0.80)<br>-1.56 (-3.88; 0.27)<br>n=53     | 0.042   | -0.328<br>(-0.647; -0.015)                    | 0.365          |
| <b>Diff MPH<sub>SDS</sub></b>                                        | -1.79 (0.97)<br>-1.77 (-4.53; 0.49)<br>n=79    | -1.55 (0.89)<br>-1.72 (-3.92; 0.03)<br>n=50     | 0.16    | -0.240<br>(-0.577; 0.100)                     | 0.255          |
| <b>Gain in height<sub>SDS</sub><br/>Puberty onset - Adult height</b> | -1.24 (0.50)<br>-1.31 (-2.63; 0)<br>n=79       | -0.417 (0.598)<br>-0.49 (-1.781; 1.626)<br>n=53 | <.0001  | -0.827<br>(-1.017; -0.638)                    | 1.54           |
| <b>Gain in height (cm)<br/>Puberty onset - Adult height</b>          | 5.82 (5.08)<br>4.6 (-0.2; 23.3)<br>n=79        | 7.87 (6.00)<br>5.6 (0.9; 26.8)<br>n=53          | 0.039   | -2.05<br>(-3.96; -0.11)                       | 0.375          |
| <b>Average GH dose<sub>Total</sub><br/>(µg/kg/day)</b>               | 46.6 (11.3)<br>48.1 (30.3; 65.9)<br>n=79       | 42.9 (12.2)<br>36.1 (30.4; 69.1)<br>n=53        | 0.071   | 3.77<br>(-0.32; 7.85)                         | 0.324          |
| <b>Time on GH (yrs)</b>                                              | 9.75 (1.97)<br>9.9 (5.3; 13.87)<br>n=79        | 5.22 (1.50)<br>5.44 (1.99; 8.29)<br>n=53        | <.0001  | 4.53<br>(3.90; 5.16)                          | 2.52           |
| <b>Duration puberty (yrs)</b>                                        | 2.87 (1.40)<br>2.78 (0; 9.26)<br>n=79          | 3.22 (1.61)<br>3.21 (0.61; 8.7)<br>n=53         | 0.20    | -0.344<br>(-0.858; 0.183)                     | 0.231          |
| <b>Gain in height<sub>SDS</sub><br/>GH start - Adult height</b>      | 0.830 (0.759)<br>0.817 (-0.694; 3.269)<br>n=79 | 1.18 (0.83)<br>1.48 (-1.32; 2.66)<br>n=53       | 0.014   | -0.354<br>(-0.630; -0.076)                    | 0.450          |

For continuous variables Mean (SD) / Median (Min; Max) / n= is presented.  
For comparison between groups the Fisher's Non Parametric Permutation Test was used for continuous variables.  
The confidence interval for the mean difference between groups is based on Fishers non-parametric permutation test.  
Effect size is absolute difference in mean / pooled SD.  
AH, adult height; GH, growth hormone; ns, not significant; SDS, standard deviation score; MPH, midparental height; DiffMPH, difference in SD score between the height of the girl and the heights of her parents.

**Suppl Table 5.** Growth from birth to adult height for **all GH** versus age group at GH-start and dose in the **PP** population; expressed in SDS versus Turner reference [ 5,6]

| Variables                           | Group                                                |                                                     |         |                                         |             |                                                   |                                                   |         |                                         |             |
|-------------------------------------|------------------------------------------------------|-----------------------------------------------------|---------|-----------------------------------------|-------------|---------------------------------------------------|---------------------------------------------------|---------|-----------------------------------------|-------------|
|                                     | GH-start 3- <9                                       |                                                     |         |                                         |             | GH-start 9-                                       |                                                   |         |                                         |             |
|                                     | Dose 33 µg                                           | Dose 67 µg                                          | p-value | Difference between groups Mean (95% CI) | Effect Size | Dose 33 µg                                        | Dose 67 µg                                        | p-value | Difference between groups Mean (95% CI) | Effect Size |
|                                     | n=25                                                 | n=28                                                |         |                                         |             | n=23                                              | n=13                                              |         |                                         |             |
| <b>At birth</b>                     |                                                      |                                                     |         |                                         |             |                                                   |                                                   |         |                                         |             |
| <b>Length SDS</b>                   | -0.520 (1.007)<br>-0.24<br>(-2.64; 0.96)<br>n=25     | -0.261 (0.921)<br>-0.04<br>(-2.24; 1.76)<br>n=28    | 0.36    | -0.259<br>(-0.786; 0.282)               | 0.269       | -0.110 (0.839)<br>-0.24<br>(-2.24; 1.36)<br>n=23  | -0.307 (1.007)<br>-0.04<br>(-2.24; 0.96)<br>n=12  | 0.57    | 0.197<br>(-0.457; 0.844)                | 0.219       |
| <b>At GH start</b>                  |                                                      |                                                     |         |                                         |             |                                                   |                                                   |         |                                         |             |
| <b>Height SDS</b>                   | -0.272 (0.783)<br>-0.264<br>(-1.545; 1.479)<br>n=25  | -0.323 (0.978)<br>-0.28<br>(-3.145; 1.449)<br>n=28  | 0.83    | 0.051<br>(-0.433; 0.555)                | 0.058       | 0.169 (0.950)<br>0.176<br>(-1.804; 2.003)<br>n=23 | 0.157 (0.695)<br>-0.023<br>(-0.95; 1.933)<br>n=13 | 0.96    | 0.012<br>(-0.586; 0.619)                | 0.014       |
| <b>+ 1 year All prepubertal</b>     |                                                      |                                                     |         |                                         |             |                                                   |                                                   |         |                                         |             |
| <b>Height<sub>SDS</sub></b>         | 0.431 (0.803)<br>0.412<br>(-0.976; 2.159)<br>n=25    | 0.749 (0.979)<br>0.884<br>(-1.853; 2.737)<br>n=28   | 0.21    | -0.318<br>(-0.810; 0.186)               | 0.353       | 0.848 (0.960)<br>0.708<br>(-1.062; 2.609)<br>n=20 | 1.45 (0.70)<br>1.43<br>(0.39; 3.05)<br>n=13       | 0.067   | -0.598<br>(-1.231; 0.047)               | 0.687       |
| <b>At puberty start</b>             |                                                      |                                                     |         |                                         |             |                                                   |                                                   |         |                                         |             |
| <b>Height SDS</b>                   | 2.41 (0.82)<br>2.43<br>(0.75; 3.77)<br>n=25          | 2.89 (1.19)<br>2.97<br>(-0.1; 4.92)<br>n=28         | 0.10    | -0.477<br>(-1.048; 0.098)               | 0.462       | 1.96 (0.58)<br>1.85<br>(1.08; 3.02)<br>n=23       | 2.61 (0.70)<br>2.86<br>(1.37; 3.42)<br>n=13       | 0.0052  | -0.649<br>(-1.098; -0.200)              | 1.04        |
| <b>At adult height</b>              |                                                      |                                                     |         |                                         |             |                                                   |                                                   |         |                                         |             |
| <b>Height SDS</b>                   | 1.94 (0.93)<br>1.84<br>(0.11; 3.62)<br>n=25          | 2.73 (1.09)<br>2.88<br>(0.77; 4.86)<br>n=28         | 0.0085  | -0.793<br>(-1.362; -0.221)              | 0.779       | 2.11 (0.50)<br>2.22<br>(0.92; 2.9)<br>n=23        | 2.78 (0.52)<br>3<br>(1.78; 3.41)<br>n=13          | 0.0005  | -0.675<br>(-1.043; -0.315)              | 1.32        |
| <b>Gain in height</b>               |                                                      |                                                     |         |                                         |             |                                                   |                                                   |         |                                         |             |
| <b>Gain in height SDS</b>           | 2.68 (0.67)<br>2.57<br>(1.54; 4.48)<br>n=25          | 3.21 (0.87)<br>3.14<br>(1.74; 5.3)<br>n=28          | 0.018   | -0.528<br>(-0.955; -0.094)              | 0.675       | 1.79 (0.96)<br>1.97<br>(0.43; 3.55)<br>n=23       | 2.45 (0.80)<br>2.64<br>(1.08; 3.42)<br>n=13       | 0.041   | -0.661<br>(-1.291; -0.030)              | 0.732       |
| <b>GH start - Puberty onset</b>     |                                                      |                                                     |         |                                         |             |                                                   |                                                   |         |                                         |             |
| <b>Gain in Height SDS</b>           | -0.474 (0.297)<br>-0.479<br>(-1.202; -0.109)<br>n=25 | -0.158 (0.463)<br>-0.196<br>(-1.147; 0.867)<br>n=28 | 0.0045  | -0.316<br>(-0.533; -0.099)              | 0.802       | 0.150 (0.412)<br>0.121<br>(-0.59; 1.242)<br>n=23  | 0.176 (0.379)<br>0.248<br>(-0.293; 1.002)<br>n=13 | 0.84    | -0.026<br>(-0.302; 0.258)               | 0.064       |
| <b>Puberty onset - Adult height</b> |                                                      |                                                     |         |                                         |             |                                                   |                                                   |         |                                         |             |
| <b>Gain in height SDS</b>           | 2.21 (0.73)<br>2.3<br>(0.69; 3.44)<br>n=25           | 3.05 (0.78)<br>2.99<br>(1.47; 4.78)<br>n=28         | 0.0002  | -0.844<br>1.260; -0.428)                | 1.12        | 1.94 (0.90)<br>2.1<br>(0.1; 3.58)<br>n=23         | 2.63 (0.65)<br>2.57<br>(1.41; 3.63)<br>n=13       | 0.020   | -0.687<br>(-1.263; -0.117)              | 0.835       |
| <b>GH start - Adult height</b>      |                                                      |                                                     |         |                                         |             |                                                   |                                                   |         |                                         |             |

For continuous variables Mean (SD) / Median (Min; Max) / n= is presented.  
 For comparison between groups the Fisher's Non Parametric Permutation Test was used for continuous variables.  
 The confidence interval for the mean difference between groups is based on Fishers non-parametric permutation test.  
 Effect size is absolute difference in mean / pooled SD.  
 AH, adult height; GH, growth hormone; SDS, standard deviation score.

Suppl Table 6a. Pre-treatment characteristics for **all girls** versus dose in the PP population, versus the Swedish references [1,2,3,4]

| Variables                      | Dose 33 µg<br>(n=48)                             | Dose 67 µg<br>(n=41)                             | p-value | Difference between<br>groups<br>Mean (95% CI) | Effect<br>Size |
|--------------------------------|--------------------------------------------------|--------------------------------------------------|---------|-----------------------------------------------|----------------|
| <b>Karyotype 45X</b>           | 27 (56.3%)                                       | 23 (56.1%)                                       |         |                                               |                |
| <b>Mosaic</b>                  | 2 (4.2%)                                         | 1 (2.4%)                                         |         |                                               |                |
| <b>Other</b>                   | 19 (39.6%)                                       | 17 (41.5%)                                       | 1.00    |                                               |                |
| <b>Missing</b>                 | 0                                                | 0                                                |         |                                               |                |
| <b>At birth</b>                | 39.0 (1.5)<br>39 (36; 42)<br>n=46                | 38.7 (1.8)<br>39 (35; 42)<br>n=38                | 0.50    | 0.272 (-0.471; 1.000)                         | 0.162          |
| <b>GA<br/>(weeks)</b>          | -2.30 (1.56)<br>-2.21 (-5.49; 0.97)<br>n=48      | -2.09 (1.14)<br>-1.94 (-4.48; 0.23)<br>n=40      | 0.48    | -0.215 (-0.812; 0.381)                        | 0.155          |
| <b>Length<br/>(SDS)</b>        | -1.59 (1.34)<br>-1.35 (-5.11; 0.42)<br>n=48      | -1.28 (1.16)<br>-0.98 (-3.92; 1.41)<br>n=41      | 0.26    | -0.311 (-0.845; 0.225)                        | 0.247          |
| <b>Weight<br/>(SDS)</b>        | -0.265 (0.774)<br>-0.261 (-1.504; 1.093)<br>n=48 | -0.032 (1.145)<br>-0.182 (-2.078; 2.333)<br>n=41 | 0.25    | -0.233 (-0.646; 0.175)                        | 0.242          |
| <b>Mother height<br/>(SDS)</b> | -0.160 (0.884)<br>-0.255 (-1.79; 1.818)<br>n=47  | -0.148 (1.112)<br>-0.101 (-3.326; 1.588)<br>n=41 | 0.95    | -0.012 (-0.434; 0.407)                        | 0.012          |
| <b>Father height<br/>(SDS)</b> | -0.282 (0.765)<br>-0.444 (-2.046; 1.185)<br>n=47 | -0.112 (1.114)<br>-0.238 (-3.356; 2.066)<br>n=41 | 0.39    | -0.170 (-0.577; 0.226)                        | 0.181          |
| <b>MPH<br/>(SDS)</b>           | -2.03 (1.70)<br>-1.71 (-5.89; 1.48)<br>n=47      | -2.01 (1.28)<br>-2.03 (-4.4; 0.9)<br>n=40        | 0.96    | -0.016 (-0.676; 0.628)                        | 0.011          |

For categorical variables n (%) is presented.  
For continuous variables Mean (SD) / Median (Min; Max) / n= is presented.  
For comparison between groups Chi Square Exact test was used for non-ordered categorical variables and the Fisher's Non Parametric Permutation Test was used for continuous variables.  
The confidence interval for the mean difference between groups is based on Fishers non-parametric permutation test.  
Effect size is absolute difference in mean / pooled SD.  
GA, gestational age; GH, growth hormone; SDS, standard deviation score; MPH, mid-parental height; DiffMPH, difference in SD score between the height of the girl and the heights of her parents.



Suppl Table 6b. Auxology from GH-start for **all girls** versus dose in the **PP** population versus the Swedish references [1,2,3,4].

| Variables                                                                                                                                                                                                                                                                                                                                                                                                                                                                                                                                                                                                          | Dose 33 µg<br>(n=48)                             | Dose 67 µg<br>(n=41)                             | p-value | Difference between<br>groups<br>Mean (95% CI) | Effect<br>Size |
|--------------------------------------------------------------------------------------------------------------------------------------------------------------------------------------------------------------------------------------------------------------------------------------------------------------------------------------------------------------------------------------------------------------------------------------------------------------------------------------------------------------------------------------------------------------------------------------------------------------------|--------------------------------------------------|--------------------------------------------------|---------|-----------------------------------------------|----------------|
| <b>At GH start</b>                                                                                                                                                                                                                                                                                                                                                                                                                                                                                                                                                                                                 |                                                  |                                                  |         |                                               |                |
| <b>Age (yrs)</b>                                                                                                                                                                                                                                                                                                                                                                                                                                                                                                                                                                                                   | 8.67 (3.43)<br>8.59 (3.04; 15.87)<br>n=48        | 7.59 (3.15)<br>7.17 (3.15; 14.77)<br>n=41        | 0.12    | 1.07 (-0.34; 2.45)                            | 0.325          |
| <b>Height<sub>SDS</sub></b>                                                                                                                                                                                                                                                                                                                                                                                                                                                                                                                                                                                        | -2.81 (0.74)<br>-2.81 (-4.43; -1.13)<br>n=48     | -2.84 (0.74)<br>-2.93 (-5.39; -1.44)<br>n=41     | 0.82    | 0.033 (-0.278; 0.342)                         | 0.045          |
| <b>Diff MPH<sub>SDS</sub></b>                                                                                                                                                                                                                                                                                                                                                                                                                                                                                                                                                                                      | -2.53 (0.85)<br>-2.38 (-4.12; -0.56)<br>n=47     | -2.73 (0.92)<br>-2.68 (-4.5; -1.08)<br>n=41      | 0.26    | 0.207 (-0.163; 0.581)                         | 0.235          |
| <b>+ 1 yr All prepubertal</b>                                                                                                                                                                                                                                                                                                                                                                                                                                                                                                                                                                                      |                                                  |                                                  |         |                                               |                |
| <b>Average GH dose<br/>(µg/kg/day)</b>                                                                                                                                                                                                                                                                                                                                                                                                                                                                                                                                                                             | 34.3 (3.7)<br>34.5 (25.5; 41.6)<br>n=48          | 55.0 (5.5)<br>55.5 (39.4; 66.4)<br>n=41          | <.0001  | -20.8 (-22.7; -18.8)                          | 4.48           |
| <b>Height<sub>SDS</sub></b>                                                                                                                                                                                                                                                                                                                                                                                                                                                                                                                                                                                        | -2.27 (0.76)<br>-2.29 (-3.87; -0.66)<br>n=45     | -1.92 (0.74)<br>-1.8 (-4.35; -0.41)<br>n=41      | 0.034   | -0.348 (-0.669; -0.028)                       | 0.464          |
| <b>At puberty start</b>                                                                                                                                                                                                                                                                                                                                                                                                                                                                                                                                                                                            |                                                  |                                                  |         |                                               |                |
| <b>Age (yrs)</b>                                                                                                                                                                                                                                                                                                                                                                                                                                                                                                                                                                                                   | 14.8 (1.4)<br>14.8 (11.2; 16.9)<br>n=48          | 13.2 (1.5)<br>13.3 (10.6; 16.6)<br>n=41          | <.0001  | 1.58 (0.97; 2.18)                             | 1.11           |
| <b>Height<sub>SDS</sub></b>                                                                                                                                                                                                                                                                                                                                                                                                                                                                                                                                                                                        | -1.19 (0.69)<br>-1.17 (-2.65; 0.27)<br>n=48      | -0.596 (0.915)<br>-0.417 (-3.022; 1.258)<br>n=41 | 0.0012  | -0.590 (-0.929; -0.252)                       | 0.737          |
| <b>Diff MPH<sub>SDS</sub></b>                                                                                                                                                                                                                                                                                                                                                                                                                                                                                                                                                                                      | -0.904 (0.876)<br>-1.045 (-2.791; 0.798)<br>n=47 | -0.484 (0.969)<br>-0.364 (-2.412; 1.794)<br>n=41 | 0.036   | -0.420 (-0.805; -0.028)                       | 0.456          |
| <b>Average GH dose<br/>Pre puberty<br/>(µg/kg/day)</b>                                                                                                                                                                                                                                                                                                                                                                                                                                                                                                                                                             | 33.8 (1.9)<br>33.5 (29.8; 39.2)<br>n=48          | 58.8 (4.2)<br>59.6 (46.7; 65.4)<br>n=41          | <.0001  | -25.0 (-26.4; -23.7)                          | 7.80           |
| <b>Gain in height<sub>SDS</sub><br/>GH start - Puberty onset</b>                                                                                                                                                                                                                                                                                                                                                                                                                                                                                                                                                   | 1.62 (0.71)<br>1.68 (0.37; 3.4)<br>n=48          | 2.25 (0.75)<br>2.21 (0.81; 4.38)<br>n=41         | 0.0002  | -0.623 (-0.930; -0.311)                       | 0.854          |
| <p>For continuous variables Mean (SD) / Median (Min; Max) / n= is presented.<br/>           For comparison between groups the Fisher's Non Parametric Permutation Test was used for continuous variables.<br/>           The confidence interval for the mean difference between groups is based on Fishers non-parametric permutation test.<br/>           Effect size is absolute difference in mean / pooled SD.<br/>           GH, growth hormone; SDS, standard deviation score; MPH, mid-parental height; DiffMPH, difference in SD score between the height of the girl and the heights of her parents.</p> |                                                  |                                                  |         |                                               |                |

Suppl Table 6c Auxology at adult height for all girls versus dose in the PP population versus the Swedish references [1,2,3,4]..

| Variables                                                            | Dose 33 µg (n=48)                                | Dose 67 µg (n=41)                           | p-value | Difference between groups Mean (95% CI) | Effect Size |
|----------------------------------------------------------------------|--------------------------------------------------|---------------------------------------------|---------|-----------------------------------------|-------------|
| <b>At adult height</b>                                               |                                                  |                                             |         |                                         |             |
| <b>Age (yrs)</b>                                                     | 17.8 (1.4)<br>17.5 (15.6; 23.5)<br>n=48          | 16.6 (1.3)<br>16.4 (14.7; 19.8)<br>n=41     | <.0001  | 1.21 (0.64; 1.79)                       | 0.894       |
| <b>Adult height (cm)</b>                                             | 155.6 (4.7)<br>155.8 (145.7; 165.4)<br>n=48      | 157.8 (5.9)<br>158.1 (145.1; 168.3)<br>n=41 | 0.058   | -2.18 (-4.42; 0.07)                     | 0.411       |
| <b>Height<sub>SDS</sub></b>                                          | -1.97 (0.77)<br>-1.94 (-3.6; -0.36)<br>n=48      | -1.61 (0.97)<br>-1.56 (-3.7; 0.12)<br>n=41  | 0.058   | -0.358 (-0.727; 0.012)                  | 0.411       |
| <b>Diff MPH<sub>SDS</sub></b>                                        | -1.69 (0.89)<br>-1.77 (-3.92; 0.03)<br>n=47      | -1.50 (0.96)<br>-1.46 (-4.07; 0.49)<br>n=41 | 0.35    | -0.188 (-0.578; 0.204)                  | 0.204       |
| <b>Gain in Height<sub>SDS</sub><br/>Puberty onset - Adult height</b> | -0.786 (0.642)<br>-0.773 (-1.878; 1.321)<br>n=48 | -1.02 (0.57)<br>-0.99 (-2.08; 0.24)<br>n=41 | 0.074   | 0.232 (-0.023; 0.489)                   | 0.382       |
| <b>Gain in height (cm)<br/>Puberty onset - Adult height</b>          | 5.55 (4.49)<br>4 (-0.2; 20)<br>n=48              | 9.09 (5.28)<br>7.6 (0.8; 20.5)<br>n=41      | 0.0010  | -3.54 (-5.60; -1.48)                    | 0.728       |
| <b>Average GH dose<sub>Total</sub><br/>(µg/kg/day)</b>               | 33.7 (1.7)<br>33.4 (31; 38.3)<br>n=48            | 58.3 (4.1)<br>58.6 (46.6; 65.9)<br>n=41     | <.0001  | -24.6 (-25.9; -23.3)                    | 8.01        |
| <b>Time on GH (yrs)</b>                                              | 7.98 (3.01)<br>8.32 (2.69; 12.61)<br>n=48        | 8.07 (2.70)<br>8.03 (2.62; 13.87)<br>n=41   | 0.88    | -0.095 (-1.287; 1.117)                  | 0.033       |
| <b>Duration puberty (yrs)</b>                                        | 3.00 (1.43)<br>2.94 (0.98; 8.15)<br>n=48         | 3.37 (1.45)<br>3.21 (1.02; 9.26)<br>n=41    | 0.25    | -0.361 (-0.967; 0.256)                  | 0.251       |
| <b>Gain in height<sub>SDS</sub><br/>GH start - Adult height</b>      | 0.839 (0.785)<br>0.821 (-1.32; 2.388)<br>n=48    | 1.23 (0.75)<br>1.24 (-0.52; 3.27)<br>n=41   | 0.020   | -0.391 (-0.714; -0.064)                 | 0.508       |

For continuous variables Mean (SD) / Median (Min; Max) / n= is presented.  
For comparison between groups the Fisher's Non Parametric Permutation Test was used for continuous variables.  
The confidence interval for the mean difference between groups is based on Fishers non-parametric permutation test.  
Effect size is absolute difference in mean / pooled SD.  
GH, growth hormone; SDS, standard deviation score; MPH, midparental height; DiffMPH, difference in SD score between the height of the girl and the heights of her parents.

Suppl Table 7a. Pre-treatment characteristics for all GH versus age group at GH-start in the PP population versus the Swedish reference {1,2,3,4}.

| Variables                                                                                                                                                                                                                                                                                                                                                                                                                                                                                                                                                                                                                                                                                                                    | GH-start 3- <9<br>(n=53)                         | GH-start 9-<br>(n=36)                            | p-value | Difference between<br>groups<br>Mean (95% CI) | Effect<br>Size |
|------------------------------------------------------------------------------------------------------------------------------------------------------------------------------------------------------------------------------------------------------------------------------------------------------------------------------------------------------------------------------------------------------------------------------------------------------------------------------------------------------------------------------------------------------------------------------------------------------------------------------------------------------------------------------------------------------------------------------|--------------------------------------------------|--------------------------------------------------|---------|-----------------------------------------------|----------------|
| <b>Karyotype 45X</b>                                                                                                                                                                                                                                                                                                                                                                                                                                                                                                                                                                                                                                                                                                         | 35 (66.0%)                                       | 15 (41.7%)                                       |         |                                               |                |
| <b>Mosaic</b>                                                                                                                                                                                                                                                                                                                                                                                                                                                                                                                                                                                                                                                                                                                | 2 (3.8%)                                         | 1 (2.8%)                                         |         |                                               |                |
| <b>Other</b>                                                                                                                                                                                                                                                                                                                                                                                                                                                                                                                                                                                                                                                                                                                 | 16 (30.2%)                                       | 20 (55.6%)                                       | 0.045   |                                               |                |
| <b>Missing</b>                                                                                                                                                                                                                                                                                                                                                                                                                                                                                                                                                                                                                                                                                                               |                                                  |                                                  |         |                                               |                |
| <b>At birth</b>                                                                                                                                                                                                                                                                                                                                                                                                                                                                                                                                                                                                                                                                                                              |                                                  |                                                  |         |                                               |                |
| <b>GA<br/>(weeks)</b>                                                                                                                                                                                                                                                                                                                                                                                                                                                                                                                                                                                                                                                                                                        | 38.7 (1.8)<br>39 (35; 42)<br>n=51                | 39.1 (1.5)<br>39 (36; 42)<br>n=33                | 0.35    | -0.374 (-1.118; 0.364)                        | 0.223          |
| <b>Length<br/>(SDS)</b>                                                                                                                                                                                                                                                                                                                                                                                                                                                                                                                                                                                                                                                                                                      | -2.27 (1.35)<br>-2.09 (-5; 0.9)<br>n=53          | -2.11 (1.44)<br>-1.93 (-5.49; 0.97)<br>n=35      | 0.63    | -0.150 (-0.748; 0.464)                        | 0.108          |
| <b>Weight<br/>(SDS)</b>                                                                                                                                                                                                                                                                                                                                                                                                                                                                                                                                                                                                                                                                                                      | -1.38 (1.33)<br>-1.16 (-5.11; 0.37)<br>n=53      | -1.54 (1.18)<br>-1.35 (-4.73; 1.41)<br>n=36      | 0.57    | 0.155 (-0.389; 0.697)                         | 0.122          |
| <b>Mother height<br/>(SDS)</b>                                                                                                                                                                                                                                                                                                                                                                                                                                                                                                                                                                                                                                                                                               | -0.122 (1.094)<br>-0.261 (-2.078; 2.333)<br>n=53 | -0.211 (0.744)<br>-0.182 (-1.775; 1.571)<br>n=36 | 0.67    | 0.089 (-0.329; 0.510)                         | 0.092          |
| <b>Father height<br/>(SDS)</b>                                                                                                                                                                                                                                                                                                                                                                                                                                                                                                                                                                                                                                                                                               | -0.268 (1.070)<br>-0.255 (-3.326; 1.434)<br>n=53 | 0.017 (0.844)<br>-0.101 (-1.713; 1.818)<br>n=35  | 0.19    | -0.284 (-0.711; 0.142)                        | 0.288          |
| <b>MPH<br/>(SDS)</b>                                                                                                                                                                                                                                                                                                                                                                                                                                                                                                                                                                                                                                                                                                         | -0.242 (1.065)<br>-0.429 (-3.356; 2.066)<br>n=53 | -0.144 (0.727)<br>-0.077 (-1.547; 1.058)<br>n=35 | 0.63    | -0.098 (-0.507; 0.308)                        | 0.104          |
| <b>DiffMPH<br/>(SDS)</b>                                                                                                                                                                                                                                                                                                                                                                                                                                                                                                                                                                                                                                                                                                     | -2.02 (1.53)<br>-2.03 (-5.79; 1.48)<br>n=53      | -2.02 (1.51)<br>-1.71 (-5.89; 0.96)<br>n=34      | 0.99    | -0.006 (-0.662; 0.655)                        | 0.004          |
| <p>For categorical variables n (%) is presented.<br/> For continuous variables Mean (SD) / Median (Min; Max) / n= is presented.<br/> For comparison between groups Chi Square Exact test was used for non-ordered categorical variables and the Fisher's Non Parametric Permutation Test was used for continuous variables.<br/> The confidence interval for then mean difference between groups is based on Fishers non-parametric permutation test.<br/> Effect size is absolute difference in mean / pooled SD.<br/> GA, gestational age; GH, growth hormone; SDS, standard deviation score; MPH, mid-parental height; DiffMPH, difference in SD score between the height of the girl and the heights of her parents.</p> |                                                  |                                                  |         |                                               |                |

Suppl Table 7b. Auxology from GH-start for **all GH** versus age group at GH-start in the PP population versus the Swedish references [1,2,3,4].

| Variables                                                                                                                                                                                                                                                                                                                                                                                                                                                                                                                                                                  | GH-start 3- <9<br>(n=53)                         | GH-start 9-<br>(n=36)                        | p-value | Difference between<br>groups<br>Mean (95% CI) | Effect<br>Size |
|----------------------------------------------------------------------------------------------------------------------------------------------------------------------------------------------------------------------------------------------------------------------------------------------------------------------------------------------------------------------------------------------------------------------------------------------------------------------------------------------------------------------------------------------------------------------------|--------------------------------------------------|----------------------------------------------|---------|-----------------------------------------------|----------------|
| <b>At GH start</b>                                                                                                                                                                                                                                                                                                                                                                                                                                                                                                                                                         |                                                  |                                              |         |                                               |                |
| <b>Age (yrs)</b>                                                                                                                                                                                                                                                                                                                                                                                                                                                                                                                                                           | 5.82 (1.61)<br>5.55 (3.04; 8.89)<br>n=53         | 11.6 (1.8)<br>11.1 (9; 15.9)<br>n=36         | <.0001  | -5.81 (-6.53; -5.08)                          | 3.42           |
| <b>Height<sub>SDS</sub></b>                                                                                                                                                                                                                                                                                                                                                                                                                                                                                                                                                | -2.83 (0.77)<br>-2.82 (-5.39; -1.13)<br>n=53     | -2.82 (0.69)<br>-2.88 (-4.43; -1.36)<br>n=36 | 0.97    | -0.006 (-0.320; 0.310)                        | 0.008          |
| <b>Diff MPH<sub>SDS</sub></b>                                                                                                                                                                                                                                                                                                                                                                                                                                                                                                                                              | -2.59 (0.93)<br>-2.4 (-4.5; -0.56)<br>n=53       | -2.67 (0.81)<br>-2.5 (-4.01; -0.86)<br>n=35  | 0.64    | 0.088 (-0.290; 0.468)                         | 0.099          |
| <b>+ 1 yr All prepubertal</b>                                                                                                                                                                                                                                                                                                                                                                                                                                                                                                                                              |                                                  |                                              |         |                                               |                |
| <b>Average GH dose<sub>Year 1</sub><br/>(µg/kg/day)</b>                                                                                                                                                                                                                                                                                                                                                                                                                                                                                                                    | 45.3 (10.9)<br>43.6 (25.5; 66.4)<br>n=53         | 41.7 (11.8)<br>35.8 (26.7; 62.5)<br>n=36     | 0.14    | 3.55 (-1.28; 8.35)                            | 0.314          |
| <b>Height<sub>SDS</sub></b>                                                                                                                                                                                                                                                                                                                                                                                                                                                                                                                                                | -2.13 (0.77)<br>-2.16 (-4.35; -0.51)<br>n=53     | -2.07 (0.76)<br>-2 (-3.87; -0.41)<br>n=33    | 0.72    | -0.065 (-0.403; 0.270)                        | 0.084          |
| <b>At puberty start</b>                                                                                                                                                                                                                                                                                                                                                                                                                                                                                                                                                    |                                                  |                                              |         |                                               |                |
| <b>Age (yrs)</b>                                                                                                                                                                                                                                                                                                                                                                                                                                                                                                                                                           | 13.6 (1.5)<br>13.7 (10.6; 16.9)<br>n=53          | 14.6 (1.6)<br>15 (11.2; 16.8)<br>n=36        | 0.0038  | -0.996 (-1.680; -0.336)                       | 0.643          |
| <b>Height<sub>SDS</sub></b>                                                                                                                                                                                                                                                                                                                                                                                                                                                                                                                                                | -0.738 (0.937)<br>-0.696 (-3.022; 1.258)<br>n=53 | -1.17 (0.62)<br>-1.17 (-2.28; -0.07)<br>n=36 | 0.015   | 0.436 (0.088; 0.790)                          | 0.528          |
| <b>Diff MPH<sub>SDS</sub></b>                                                                                                                                                                                                                                                                                                                                                                                                                                                                                                                                              | -0.496 (0.993)<br>-0.459 (-2.791; 1.794)<br>n=53 | -1.03 (0.76)<br>-1.29 (-2.14; 0.67)<br>n=35  | 0.0074  | 0.535 (0.145; 0.930)                          | 0.590          |
| <b>Average GH dose<br/>Pre puberty<br/>(µg/kg/day)</b>                                                                                                                                                                                                                                                                                                                                                                                                                                                                                                                     | 47.1 (12.9)<br>52 (30.8; 65.4)<br>n=53           | 42.7 (12.7)<br>35.2 (29.8; 63.4)<br>n=36     | 0.12    | 4.35 (-1.06; 9.84)                            | 0.339          |
| <b>Gain in Height<sub>SDS</sub><br/>GH start - Puberty onset</b>                                                                                                                                                                                                                                                                                                                                                                                                                                                                                                           | 2.09 (0.76)<br>2.09 (0.61; 4.38)<br>n=53         | 1.65 (0.77)<br>1.73 (0.37; 2.88)<br>n=36     | 0.0070  | 0.442 (0.117; 0.767)                          | 0.579          |
| <p>For continuous variables Mean (SD) / Median (Min; Max) / n= is presented.<br/> For comparison between groups the Fisher's Non Parametric Permutation Test was used for continuous variables.<br/> The confidence interval for the mean difference between groups is based on Fishers non-parametric permutation test.<br/> Effect size is absolute difference in mean / pooled SD.<br/> GH, growth hormone; SDS, standard deviation score; MPH, mid-parental height; DiffMPH, difference in SD score between the height of the girl and the heights of her parents.</p> |                                                  |                                              |         |                                               |                |

Suppl Table 7c. Auxology at adult height for **all GH** versus age group at GH-start in the PP population versus the Swedish references [1,2,3,4].

| Variables                                                                                                                                                                                                                                                                                                                                                                                                                                                                                                                                                                                                                                                 | GH-start 3- <9 (n=53)                          | GH-start 9- (n=36)                               | p-value | Difference between groups Mean (95% CI) | Effect Size |
|-----------------------------------------------------------------------------------------------------------------------------------------------------------------------------------------------------------------------------------------------------------------------------------------------------------------------------------------------------------------------------------------------------------------------------------------------------------------------------------------------------------------------------------------------------------------------------------------------------------------------------------------------------------|------------------------------------------------|--------------------------------------------------|---------|-----------------------------------------|-------------|
| <b>At adult height</b>                                                                                                                                                                                                                                                                                                                                                                                                                                                                                                                                                                                                                                    |                                                |                                                  |         |                                         |             |
| <b>Age (yrs)</b>                                                                                                                                                                                                                                                                                                                                                                                                                                                                                                                                                                                                                                          | 16.8 (1.3)<br>16.5 (14.7; 21.4)<br>n=53        | 17.9 (1.5)<br>18 (14.8; 23.5)<br>n=36            | 0.0002  | -1.16 (-1.74; -0.57)                    | 0.843       |
| <b>Adult height (cm)</b>                                                                                                                                                                                                                                                                                                                                                                                                                                                                                                                                                                                                                                  | 155.8 (6.0)<br>156.1 (145.1; 168.3)<br>n=53    | 157.8 (4.1)<br>158.1 (145.7; 165.5)<br>n=36      | 0.075   | -2.08 (-4.31; 0.22)                     | 0.391       |
| <b>Height<sub>SDS</sub></b>                                                                                                                                                                                                                                                                                                                                                                                                                                                                                                                                                                                                                               | -1.95 (0.98)<br>-1.89 (-3.7; 0.12)<br>n=53     | -1.60 (0.68)<br>-1.56 (-3.6; -0.34)<br>n=36      | 0.075   | -0.341 (-0.709; 0.037)                  | 0.391       |
| <b>Diff MPH<sub>SDS</sub></b>                                                                                                                                                                                                                                                                                                                                                                                                                                                                                                                                                                                                                             | -1.70 (0.93)<br>-1.64 (-4.07; 0.49)<br>n=53    | -1.45 (0.90)<br>-1.5 (-3.92; 0.03)<br>n=35       | 0.21    | -0.252 (-0.648; 0.144)                  | 0.275       |
| <b>Gain in height<sub>SDS</sub><br/>Puberty onset - Adult height</b>                                                                                                                                                                                                                                                                                                                                                                                                                                                                                                                                                                                      | -1.21 (0.43)<br>-1.21 (-2.08; -0.54)<br>n=53   | -0.430 (0.556)<br>-0.478 (-1.781; 1.321)<br>n=36 | <.0001  | -0.778 (-0.984; -0.569)                 | 1.61        |
| <b>Gain in height (cm)<br/>Puberty onset - Adult height</b>                                                                                                                                                                                                                                                                                                                                                                                                                                                                                                                                                                                               | 6.46 (5.19)<br>4.8 (-0.2; 20.5)<br>n=53        | 8.24 (4.99)<br>7.4 (1.1; 20.1)<br>n=36           | 0.12    | -1.78 (-3.95; 0.48)                     | 0.348       |
| <b>Average GH dose<sub>Total</sub><br/>(µg/kg/day)</b>                                                                                                                                                                                                                                                                                                                                                                                                                                                                                                                                                                                                    | 46.6 (12.5)<br>50 (31; 65.9)<br>n=53           | 42.8 (12.8)<br>34.6 (31.2; 63.4)<br>n=36         | 0.15    | 3.86 (-1.48; 9.27)                      | 0.306       |
| <b>Time on GH (yrs)</b>                                                                                                                                                                                                                                                                                                                                                                                                                                                                                                                                                                                                                                   | 9.88 (1.87)<br>9.86 (5.36; 13.87)<br>n=53      | 5.29 (1.55)<br>5.42 (2.62; 8.29)<br>n=36         | <.0001  | 4.58 (3.83; 5.33)                       | 2.62        |
| <b>Duration puberty (yrs)</b>                                                                                                                                                                                                                                                                                                                                                                                                                                                                                                                                                                                                                             | 3.10 (1.44)<br>3.03 (0.98; 9.26)<br>n=53       | 3.27 (1.46)<br>3.24 (0.98; 8.15)<br>n=36         | 0.61    | -0.163 (-0.776; 0.478)                  | 0.112       |
| <b>Gain in height<sub>SDS</sub><br/>GH start - Adult height</b>                                                                                                                                                                                                                                                                                                                                                                                                                                                                                                                                                                                           | 0.883 (0.776)<br>0.817 (-0.694; 3.269)<br>n=53 | 1.22 (0.78)<br>1.4 (-1.32; 2.39)<br>n=36         | 0.048   | -0.335 (-0.667; -0.004)                 | 0.432       |
| <p>For continuous variables Mean (SD) / Median (Min; Max) / n= is presented.<br/>                     For comparison between groups the Fisher's Non Parametric Permutation Test was used for continuous variables.<br/>                     The confidence interval for the mean difference between groups is based on Fishers non-parametric permutation test.<br/>                     Effect size is absolute difference in mean / pooled SD.<br/>                     GH, growth hormone; SDS, standard deviation score; MPH, midparental height; DiffMPH, difference in SD score between the height of the girl and the heights of her parents.</p> |                                                |                                                  |         |                                         |             |

Table of Contents:

References:..... 2

**Suppl Table 1a.** Pre-treatment characteristics for the young subgroup versus dose in the PP population versus Swedish references {1,2,3,4}. ..... 3

**Suppl Table 1b.** Auxology from GH-start for the young subgroup versus dose for the PP population versus Swedish references {1,2,3,4}..... 4

**Suppl Table 1c** Auxology at adult height for the young subgroup versus dose in the PP population versus the Swedish references [1,2,3,4].. ..... 5

**Suppl Table 2a.** Pre-treatment characteristics for the old subgroup versus dose in the PP population versus Swedish references {1,2,3,4}. ..... 6

**Suppl Table 2b.** Auxology from GH-start for the old subgroup versus dose for the PP population versus Swedish references {1,2,3,4}..... 7

**Suppl Table 2c** Auxology at adult height for the old subgroup versus dose in the PP population versus the Swedish references [1,2,3,4].. ..... 8

**Suppl Table 3a.**Pre-treatment characteristics for all girls versus dose in the ITT population, versus Swedish references {1,2,3,4}. ..... 9

**Suppl Table 3b.** Auxology from GH-start for all girls versus dose for the ITT population versus Swedish references {1,2,3,4}. ..... 10

**Suppl Table 3c** Auxology at adult height for all girls versus dose ..... 11  
in the ITT population versus the Swedish references {1,2,3,4}..... 11

**Suppl Table 4a.** Pre-treatment characteristics for all girls versus age at GH-start in ITT population versus the Swedish references {1,2,3,4}. ..... 12

**Suppl Table 4b.** Auxology from GH-start for all girls versus age at GH-start in the ITT population versus the Swedish references {1,2,3,4}. ..... 13

**Suppl Table 4c.** Auxology at adult height for all girls versus age at GH-start in the ITT population versus the Swedish references {1,2,3,4}.. ..... 14

**Suppl Table 5.** Growth from birth to adult height for all girls versus age at GH-start and dose in the PP population; expressed in SDS versus the Turner reference 5,6]..... 15

**Suppl Table 6a.** Pre-treatment characteristics for all girls versus dose in the PP population, versus the Swedish references {1,2,3,4}..... 16

**Suppl Table 6b.** Auxology from GH-start for all girls versus dose in the PP population versus the Swedish references [1,2,3,4]. ..... 17

**Suppl Table 6c** Auxology at adult height for all girls versus dose in the PP population versus the Swedish references [1,2,3,4]..... 18

**Suppl Table 7a.** Pre-treatment characteristics for all girls versus age at GH-start in the PP population versus the Swedish reference {1,2,3,4}. ..... 19

**Suppl Table 7b.** Auxology from GH-start for all girls versus age at GH-start in the PP population versus the Swedish references [1,2,3,4]. ..... 20

**Suppl Table 7c.** Auxology at adult height for all girls versus age at GH-start in the PP population versus the Swedish references [1,2,3,4]. ..... 21
